1 **Muscle specific translational control of Cand2 by mTORC1 regulates adverse cardiac**  
2 **remodeling**

3  
4 Agnieszka A. Gorska<sup>1,2#</sup>, Clara Sandmann<sup>1,2#</sup>, Eva Riechert<sup>1,2</sup>, Christoph Hofmann<sup>1,2</sup>, Ellen  
5 Malovrh<sup>1,2</sup>, Eshita Varma<sup>1,2</sup>, Vivien Kmietczyk<sup>1,2</sup>, Lonny Jürgensen<sup>1,2</sup>, Verena Kamuf-Schenk<sup>1,2</sup>,  
6 Claudia Stroh<sup>1,2</sup>, Jennifer Furkel<sup>1,2</sup>, Matthias H. Konstandin, Carsten Sticht<sup>3</sup>, Etienne  
7 Boileau<sup>1,2,4</sup>, Christoph Dieterich<sup>1,2,4</sup>, Hugo A. Katus<sup>1,2</sup>, Shirin Doroudgar<sup>1,2</sup> and Mirko Völkers<sup>\*1,2</sup>  
8

9 <sup>1</sup> Department of Cardiology, Angiology and Pneumology, University Hospital Heidelberg, Im  
10 Neuenheimer Feld 410, 69120 Heidelberg, Germany

11 <sup>2</sup> DZHK (German Centre for Cardiovascular Research), partner site Heidelberg/Mannheim,  
12 Germany

13 <sup>3</sup> Medical Research Center, Medical Faculty Mannheim, Heidelberg University, Mannheim,  
14 Germany

15 <sup>4</sup> Section of Bioinformatics and Systems Cardiology, Department of Cardiology, Angiology, and  
16 Pneumology and Klaus Tschira Institute for Integrative Computational Cardiology, University  
17 of Heidelberg, Heidelberg, Germany

18 # authors contributed equally

19  
20 **Running title:** Cand2 and cardiac remodeling

21  
22 **Correspondence:**

23 **Dr. Mirko Völkers**

24 email: [mirko.voelkers@med.uni-heidelberg.de](mailto:mirko.voelkers@med.uni-heidelberg.de)  
25  
26

27•  
28•  
29• **Keywords:** Cand2/ Cardiac/ Hypertrophy/ mTOR

30 **Abstract**

31 The mechanistic target of rapamycin (mTOR) is a key regulator of pathological remodeling in  
32 the heart by activating ribosomal biogenesis and mRNA translation. Inhibition of mTOR in  
33 cardiomyocytes is protective, however, a detailed role of mTOR in translational regulation of  
34 specific mRNA networks in the diseased heart is largely unknown. A cardiomyocyte genome-  
35 wide sequencing approach was used to define mTOR-dependent post-transcriptional gene  
36 expression control at the level of mRNA translation. This approach identified the muscle-  
37 specific protein Cullin-associated NEDD8-dissociated protein 2 (Cand2) as a translationally  
38 upregulated gene, dependent on the activity of mTOR. Deletion of Cand2 protects the  
39 myocardium against pathological remodeling. Mechanistically, we found that Cand2 links  
40 mTOR signaling to pathological cell growth by increasing Grk5 protein expression. Our data  
41 suggest that cell-type-specific targeting of mTOR might have therapeutic value for adverse  
42 pathological cardiac remodeling.

43

44 **Non-standard Abbreviations and acronyms**

|              |                                               |
|--------------|-----------------------------------------------|
| 45 Cand2     | Cullin-associated NEDD8-dissociated protein 2 |
| 46 CPM       | Count Per Million                             |
| 47 RPKM      | Reads Per Kilobase Million                    |
| 48 DEGs      | Differential Expressed Genes                  |
| 49 IP        | Immunoprecipitation                           |
| 50 mTOR      | Mechanistic Target Of Rapamycin               |
| 51 nt        | Nucleotide                                    |
| 52 NRCMs     | Neonatal Rat Cardiac Myocytes                 |
| 53 LV        | Left ventricle                                |
| 54 RPF       | Ribosome Protected mRNA Fragments             |
| 55 Ribo-seq  | Ribosomal sequencing                          |
| 56 RNA-seq   | RNA sequencing                                |
| 57 TOP-motif | Terminal oligo pyrimidin motif                |
| 58 5'UTR     | 5' Untranslated Region                        |
| 59 IRES      | Internal Ribosomal Entry Site                 |
| 60 TAC       | Transverse Aortic Constriction                |
| 61 PE        | Phenylephrine                                 |
| 62 Cx        | Cycloheximide                                 |
| 63 PLA       | Proximity Ligation Assay                      |
| 64 WT        | Wild-type                                     |
| 65 KO        | Knock-out                                     |
| 66 KD        | Knock-down                                    |
| 67 OE        | Overexpression                                |

68

## 69 Introduction

70 Pathological cellular remodeling is a hallmark of heart failure (HF) independent from  
71 the underlying etiology such as pressure overload, myocardial infarction, or inherited  
72 cardiomyopathies. Several studies and our recent work revealed that pathological cardiac  
73 stress induces early morphological changes and cardiac hypertrophy due to the activation of  
74 the kinase mechanistic target of rapamycin complex 1 (mTORC1)(Buss *et al*, 2009; Völkers *et*  
75 *al*, 2013; Sciarretta *et al*, 2018; Zhang *et al*, 2010). mTORC1 promotes protein synthesis by  
76 induction of rRNA transcription, ribosomal protein synthesis, phosphorylation of translation  
77 initiation factors and enhances translation of specific mRNAs that are required for stress  
78 adaptation (Ma & Blenis, 2009)(Iadevaia *et al*, 2012). Mechanistically, mTORC1 promotes  
79 translation of a specific subset of mRNAs regulated by the translation initiation factor eIF4E by  
80 direct phosphorylation of the eIF4E binding proteins (4E-BPs) (Thoreen *et al*, 2012)(Hsieh *et*  
81 *al*, 2012). mTORC1-sensitive transcripts often contain a terminal oligo-pyrimidine (TOP) or  
82 TOP-like motif in the 5' UTR and mTORC1-dependent transcripts are predominantly regulated  
83 on the translational level (Jefferies *et al*, 1994) (Avni *et al*, 1996)(Thoreen *et al*, 2012).

84 Systemic pharmacological or genetic mTORC1 inhibition prevents pathological  
85 hypertrophy and improves cardiac function in murine disease models (Buss *et al*, 2009; Shioi  
86 *et al*, 2003; Völkers *et al*, 2013), but no established therapeutic regime targets mTORC1 at the  
87 level of cardiomyocytes in patients yet. Moreover, the role of mTORC1 in translational  
88 regulation of specific mRNA networks in the diseased heart is largely unknown, partly because  
89 existing tools in previous studies were unable to analyze gene expression at the level of  
90 translation.

91 We aimed to characterize mTORC1-dependent changes in gene expression that  
92 mediate cardiac response to pathological stress. Ribosome profiling (Ribo-seq) was used to  
93 obtain quantitative measurements of translation, and to dissect the mTORC1-dependent  
94 translational regulation of gene expression in cardiomyocytes. Among other genes dependent  
95 on the activity of mTORC1 was the uncharacterized muscle-specific gene Cullin-associated  
96 NEDD8-dissociated protein 2 (Cand2). Initially named transcription factor TATA-binding  
97 protein 120B (TIP120B), Cand2 belongs to the TIP120 gene family and shares 60% homology  
98 with TIP120A (Cand1) (Aoki *et al*, 1999).

99 In contrast to ubiquitously expressed Cand1, Cand2 is a muscle-specific protein and  
100 has been identified only in mammals. Both proteins have been shown to directly bind and  
101 modulate the activity status of Cullin1 (Cul1) (Liu *et al*, 2002)(Goldenberg *et al*, 2004)(Shiraishi  
102 *et al*, 2007). Cul1 is a component of SCF-like E3 ligase complex that promotes ubiquitination  
103 (Zheng *et al*, 2002)(Furukawa *et al*, 2000)(Zou *et al*, 2018). The activation of the SCF complex  
104 is stimulated by reversible and covalent post-translational modification (neddylation) of CUL1,  
105 which relies on ligation of the ubiquitin-like polypeptide Nedd8 protein to a specific lysine  
106 residue in the C-terminus (Goldenberg *et al*, 2004)(Min *et al*, 2005).

107 We found that pressure overload induced Cand2 expression on the level of translation  
108 which depends on the activity of mTORC1. Cand2 is required and sufficient for pathological  
109 growth. Cand2 knock-out mice are protected against pathological remodeling. Mechanistically,  
110 Cand2 post-transcriptionally controls the expression of G-protein coupled receptor 5 (Grk5)  
111 expression *in vitro* and *in vivo*, which in turn is linked to transcription of hypertrophic genes  
112 driven by myocyte enhancer factor 2 (MEF2).

113 Our data highlighted a novel mechanism where translational, mTORC1-dependent,  
114 control of Cand2 expression results in increased expression of Grk5 which results in  
115 transcriptional reprogramming in diseased cardiac myocytes (mRNA translation controls  
116 transcriptional activity). This linked mTOR dependent cytosolic signaling events, that drive  
117 specific mRNA translation, to transcriptional activity.

118  
119  
120  
121  
122

## 123 Results

### 124 **Cand2 is a myocyte-specific protein translationally upregulated during pathological** 125 **stress**

126 To define mRNAs translationally regulated by mTOR signaling in response to  
127 pathological cell growth, cultures of neonatal rat ventricular cardiomyocytes (NRCMs) were  
128 acutely treated with the  $\alpha$ -1 adrenoreceptor agonist phenylephrine (PE) and with Torin 1, which  
129 inhibits mTOR by binding to the ATP-binding site in the kinase domain (Thoreen *et al*, 2012).  
130 Specific inhibition of mTOR-dependent protein signaling by Torin 1 was confirmed by  
131 immunoblots (**EV1**). Ribosome profiling (Ribo-seq) has emerged as a quantitative technique  
132 to study global gene expression, and overcomes limitations of classical expression analysis,  
133 as it directly quantifies the number of translating ribosomes (Ingolia *et al*, 2009). The effect of  
134 Torin 1 on mRNA translation was analyzed by Ribo-seq in cultured cardiomyocytes (**Fig. 1A**).  
135 Total cellular RNA was also collected for parallel RNA-seq to quantify mRNA abundance (the  
136 full list is provided in **Source Data set**).

137 We identified 199 genes that decreased and 165 that increased ( $\log_2$  FC > 1 or < -1) in  
138 Ribo-seq in an mTOR-dependent manner in response to PE treatment (**Fig. 1B**). Among the  
139 suppressed genes, 17% have a known TOP or TOP-like motif in the 5' UTR (**Fig. 1C**), which  
140 is known to be sensitive to mTOR inhibition (Thoreen *et al*, 2012), and the suppressed genes  
141 are predominantly regulated on the translational level (**Fig. 1D**). Immunoblotting confirmed a  
142 decrease in the expression of selected mTOR-dependent genes such as eEF2 and rpS5 at  
143 the protein level upon Torin 1 treatment (**EV1**) but not at the transcript level. In contrast,  
144 molecular markers of pathological growth such as *Nppb* and *Nppa* were still induced (**EV1**).  
145 Stimulation of NRCMs with PE resulted in a strong increase in mRNAs in polysomal fractions  
146 (**EV1**). The increase of mRNAs in the polysomal fraction induced by PE was blocked by Torin  
147 1, confirming that Torin 1 blocks the recruitment of ribosomes into polysomal fractions. The  
148 effects of inhibiting of mTOR on cardiac myocyte growth were examined in isolated cardiac  
149 myocytes stimulated with PE for 24h. Torin 1 inhibited PE-induced hypertrophy as assessed  
150 by cell surface area measurements (**EV2**). To measure the effect of Torin 1 on cap-dependent  
151 translation in cells, we used a dual-luciferase reporter vector that distinguishes cap-dependent  
152 versus cap-independent translation by separating Renilla luciferase from firefly with the Polio  
153 IRES (Poulin *et al*, 1998) (**EV2**). Therefore, the Renilla/firefly ratio would determine the cap-  
154 dependent translation ratio. Torin 1 inhibited cap-dependent, but not IRES-dependent  
155 translation measured by luciferase activity.

156 In line with the *in vitro* data, mTOR inhibition with Torin 1, *in vivo*, blocked pathologic growth  
157 induced by acute transverse constriction (TAC) surgery, a common model for cardiac  
158 hypertrophy and remodeling (**EV2**) (Doroudgar *et al*, 2019). Thus, mTOR-dependent and cap-  
159 dependent protein synthesis are increased during hypertrophic growth and this is necessary  
160 for induction of cell growth, *in vitro* and *in vivo*.

161 Gene ontology (biological processes) analysis of the genes that were suppressed by  
162 Torin 1 showed strong enrichment for those involved in translation, metabolism, as well as  
163 signaling cascades (**Fig. 1E**). Overall, this dataset defined a specific subset of genes that are  
164 regulated in an mTOR-dependent manner in response to neurohumoral stimulation with PE.  
165 Next, we followed our identified mTOR-dependent genes in a previously published *in vivo* data  
166 set after TAC surgery (Doroudgar *et al*, 2019). mTOR-dependent genes were translationally  
167 upregulated in response to TAC surgery (**Fig. 1F-G**). Increased expression of identified mTOR  
168 targets independent from changes of transcript levels such as eEF2, Desmin, rpS5, or rpS20  
169 were confirmed using immunoblots and RT-qPCRs from heart lysates after TAC surgery (**Fig.**  
170 **1H-I**).

171 Among the 199 genes with decreased translation upon Torin 1 treatment, 17 were  
172 significantly increased in the *in vivo* data set after TAC surgery (Doroudgar *et al*, 2019) (**Fig.**  
173 **2A**). Among this subset of genes that were increased by pressure overload *in vivo* and  
174 dependent on mTOR activity *in vitro*, was Cand2, a muscle specific protein with unknown role  
175 in the heart<sup>12</sup>. (**Table Fig. 2A**). Since its role in cardiomyocytes was completely unknown, we  
176 aimed to characterize the role of Cand2 during pathological remodeling. Torin 1-induced

177 downregulation of Cand2 translation was not due to transcriptional regulation assessed by  
178 parallel RNA-seq (**Fig. 2B**). mTOR activity increased Cand2 protein levels *in vitro*, as well, but  
179 had no impact on its transcript levels measured by RT-qPCR (**Fig. 2C-D**), confirming the  
180 results from the Ribo-seq data sets. Ribo-seq data revealed an increased expression of Cand2  
181 two days after TAC (**Fig. 2E**). In contrast, Cand2 translation was unchanged in early (3 hours  
182 after TAC) and chronic pressure overload (2 weeks after TAC) (**Fig. 2F-G**). Translational  
183 upregulation of Cand2 in the heart was also detected on the protein level when compared by  
184 immunoblotting to sham-operated mice (**Fig. 2H**). Increased Cand2 levels *in vivo* were also  
185 not caused by increased Cand2 transcript levels as shown by RT-qPCR (**Fig. 2I**). To assess  
186 whether Cand2 expression is controlled by mTORC1 *in vivo*, Torin 1 was injected in mice after  
187 TAC or sham surgery and Cand2 levels were assessed by immunoblotting (**Fig. 2H**). The  
188 known mTORC1-sensitive 40S ribosomal protein 5 (rpS5) was used as a positive control  
189 (Uprety *et al*, 2018). Along with rpS5 inhibition by Torin 1, increased Cand2 protein levels after  
190 TAC surgery were completely blocked by Torin 1, suggesting that Cand2 mRNA belongs to  
191 mTORC1-sensitive genes, *in vivo*, as well. Since mTORC1 specifically regulates translation of  
192 mRNAs with 5'TOP motifs, we placed the 5' UTR of Cand2 mRNA upstream of *Renilla*  
193 luciferase to investigate its regulatory potential in a mTORC1-dependent manner (**Fig. 2J**).  
194 Cand2 5' UTR showed a similar degree of reporter inhibition with Torin 1 treatment as the  
195 known TOP motif-containing 5' UTR of eEF2. This confirmed mTORC1-dependent translation  
196 of Cand2 and suggests the presence of a regulatory motif in its 5' UTR. Taken together,  
197 mTORC1 controls the expression levels of Cand2 in response to pathological stimulation both  
198 *in vitro* and *in vivo*.

199 To further characterize Cand2, we analyzed its expression profile in different organs in  
200 mice. Consistently with a previous report (Aoki *et al*, 1999), Cand2 protein was expressed  
201 predominantly in muscle tissues and was highly abundant in the left ventricle (**Fig. 3A**).  
202 Quantitative RT-PCR analysis also revealed the highest Cand2 mRNA level in the heart (**Fig.**  
203 **3B**). Immunofluorescent staining confirmed specific Cand2 expression only in cardiomyocytes  
204 (**Fig. 3C**), suggesting that Cand2 protein expression is restricted to muscle cells in the heart.  
205 Subsequently, we analyzed Cand2 subcellular localization in isolated cardiomyocytes by  
206 immunofluorescent staining (**Fig. 3D**). Consistently with studies on skeletal muscle cell  
207 maturation (Shiraishi *et al*, 2007), endogenous Cand2 was located in the nucleus and  
208 cytoplasm in cardiac myocytes. Subcellular fractionation of the left ventricle confirmed the  
209 cytoplasmic and nuclear distribution of Cand2 (**Fig. 3E**).

### 210 **Cand2 contributes to cardiomyocytes pathological growth *in vitro* and *in vivo***

211 Next, we studied the effect of Cand2 on cardiomyocyte cell size after Cand2 knock-  
212 down or overexpression (**Fig. 4A-B**). Cand2 depletion *in vitro* decreased cell surface area and  
213 blunted the response to neurohormonal stimulation with PE treatment (**Fig. 4C-D**). In contrast,  
214 Cand2 overexpression induced cardiomyocyte growth, and the increase in cell size after  
215 overexpression was comparable to control cells after PE (**Fig. 4E**). *Nppa* levels correlated to  
216 Cand2 expression: they were decreased when Cand2 was depleted and elevated in Cand2  
217 overexpression in untreated and PE stimulated cardiomyocytes (**Fig. 4F**).

218 To study the role of Cand2 *in vivo*, a novel Cand2 knock-out (KO) mouse was generated  
219 (**EV3**). Cand2 deficient mice were viable and cardiac function as assessed by ejection fraction,  
220 as well as left ventricle weight to body weight ratio remained unchanged compared to littermate  
221 control animals (**EV3**). In line with this, Cand2 KO did not alter the levels of fetal gene markers  
222 normally upregulated in the adult heart during stress, such as *Nppa* and *Nppb* (**EV3**).  
223 Moreover, Cand2 knock-out did not disturb the levels of Cand1 (**EV3**)

224 Next, Cand2 KO mice along with wild-type (WT) littermates were subjected to TAC or  
225 sham surgery and phenotypic consequences were analyzed 4 weeks after surgery. TAC  
226 operation resulted in decreased ejection fraction, fractional shortening and increased LV/BW  
227 ratio in WT mice (**Fig. 4G-I**). In contrast, Cand2 deficient mice showed preserved cardiac  
228 function as well as significantly decreased LV/BW ratio compared to TAC-operated WT mice.  
229 Moreover, TAC-induced *Nppa* and *Nppb* levels in WT mice were 1.9-fold and 3-fold reduced

230 in *Cand2* KO mice, respectively (**Fig. 4J**). Overall, these results suggest that *Cand2* deletion  
231 protects against pathological remodeling in response to pressure overload.

### 232 ***Cand2* controls *Grk5* expression and affects MEF2-dependent transcription**

233 Next, we performed transcriptome profiling of left ventricles from wild-type and *Cand2*  
234 knock-out mice to identify targets that might be regulated by *Cand2*. mRNA sequencing  
235 identified only small changes in the transcriptome when *Cand2* was deleted (**Fig. 5A**).  
236 Interestingly, pathway analysis revealed that most of the *Cand2*-dependent genes are enriched  
237 in categories regulating transcriptional control and proteasomal function. Among the *Cand2*-  
238 dependent group of genes involved in transcriptional control, the G-protein coupled receptor  
239 kinase 5 (*Grk5*) has been one of the most regulated genes in *Cand2* knock-out mice (**Fig. 5A**).  
240 While the canonical role of Grks is to phosphorylate agonist bound G-protein coupled  
241 receptors, which promotes the binding of an arrestin protein to the receptor, resulting in  
242 subsequent desensitization of the receptor, *Grk5* has been found to localize to the nucleus *via*  
243 a nuclear localization sequence. Previous work showed that following pressure overload, *Grk5*  
244 accumulates in the nucleus of cardiomyocytes and acts as a class II histone deacetylase  
245 (HDAC) kinase, phosphorylating HDAC5 specifically, leading to its nuclear export and de-  
246 repression of the transcription factor MEF2 (Zhang *et al*, 2011).

247 First, we analyzed *Grk5* expression after gain- or loss-of-function of *Cand2 in vitro* in  
248 neonatal rat ventricular myocytes (NRCMs) (**Fig. 5B-C**). *Cand2* overexpression increased  
249 *Grk5* protein in NRCMs but did not change its mRNA levels. In contrast, *Grk5* protein was  
250 downregulated in *Cand2* knock-down and *Grk5* transcript level again remained unaffected.  
251 Next, we further analyzed levels of *Grk5* in *Cand2* KO mice in TAC-induced pressure overload  
252 2 weeks after surgery (**Fig. 5D**). Quantitative RT-PCR analysis did not reveal any significant  
253 changes in *Grk5* mRNA levels after TAC in *Cand2* KO mice (**Fig. 5D**). In line with other reports,  
254 *Grk5* protein was highly increased in TAC-operated wild-type mice. Lack of *Cand2* led to an  
255 approximately 10-fold decrease of *Grk5* protein levels after TAC. Since *Grk5* has been shown  
256 to translocate to the nucleus of cardiomyocytes following pressure overload *via* its nuclear  
257 localization signal (NLS) (Johnson *et al*, 2004)(Martini *et al*, 2008)(Gold *et al*, 2013), we  
258 examined *Grk5* levels in the cytoplasm and nucleus *in vivo* in *Cand2* KO mice (**Fig. 5E**). Neither  
259 TAC nor lack of *Cand2* affected *Grk5* levels in the cytoplasmic fraction, but *Grk5* levels  
260 increased in the nucleus in WT mice in response to TAC, which was blocked in *Cand2* mice.

261 Since *Grk5* regulates the activity of the transcription factor MEF2, we analyzed MEF2  
262 activity by using a luciferase reporter assay. *Cand2* knock-down decreased MEF2 luciferase  
263 activity by 3.5-fold *in vitro* (**Fig. 6A**). Moreover, the expression of direct MEF2-dependent  
264 mRNAs such as *Nr4a1* and *Xirp2* (Lehmann *et al*, 2018)(Huang *et al*, 2006) were  
265 downregulated when *Cand2* was depleted (**Fig. 6B**). Conversely, the levels of *Nr4a1* and *Xirp2*  
266 increased significantly in NRCMs overexpressing *Cand2* (**Fig. 6C**). In line, levels of *Xirp2*  
267 increased in WT mice in response to TAC but were blocked in *Cand2* KO mice (**Fig. 6D**).  
268 Similarly, mTOR inhibition with Torin1 resulted in decreased *Grk5* protein levels and MEF2  
269 luciferase activity in NRCMs, without changes in mRNA levels of *Grk5* (**Fig. 6E**). Next, we  
270 confirmed decreased *Cand2* and *Grk5* protein but not transcript levels after depletion of Raptor,  
271 the essential component of mTORC1, in myocytes (**Fig. 6F**). Raptor knockdown caused  
272 decreased protein levels of *Cand2* and *Grk5* (**Fig. 6G**). Moreover, RT-qPCR analysis revealed  
273 downregulation of direct MEF2 targets such as *Nr4a1* and *Xirp2* as well as *Nppa* after knock-  
274 down of Raptor (**Fig. 6H**), suggesting that *Grk5* expression and *Grk5*-mediated MEF2 activity  
275 are under direct mTORC1 control. Overall, these results suggest that *Cand2* dependent  
276 regulation of *Grk5* levels is associated with increased MEF2 transcriptional activity and  
277 similarly to *Cand2*, *Grk5*-MEF2 is downstream of mTORC1 as well.

### 278 ***Cand2* regulates *Grk5* protein level by Cullin1 neddylation inhibition.**

279 Our findings showed that *Cand2* depletion results in decreased *Grk5* protein levels  
280 independent from changes in transcript levels (**Fig. 5B**), suggesting post-transcriptional  
281 regulation of *Grk5* expression by *Cand2*. *Cand* proteins modulate the activity of Cullin-RING  
282 E3 ubiquitin ligases (CRLs). The activity of CRLs is largely dependent on Cullin neddylation,

283 whereby a covalent modification of Cullin1 with the ubiquitin-like protein Nedd8 will induce the  
284 conformational rearrangement of Cullin1. Cand2 protein has been shown to interact with and  
285 sequester unneddylated Cullin1. To find out whether Cand2, Cullin1, and Grk5 directly interact  
286 in cardiomyocytes, co-immunoprecipitations were performed. Endogenous Cullin1 as well as  
287 Grk5 was detected after Cand2 immunoprecipitation, whereas Cul4 did not bind Cand2 (**EV4**).  
288 Additionally, we performed proximity ligation assay (PLA) in neonatal cardiomyocytes isolated  
289 from wild type and Cand2 knock-out mice (**EV4**). PLA signal was detected in cardiomyocytes  
290 expressing endogenous Cand2, but not in KO cells, suggesting that Cand2 is associated with  
291 Grk5 specifically. Although both proteins were observed ubiquitously in the cell, PLA signal  
292 was concentrated in the nucleus. These results support the idea that Cand2 interacts in a  
293 complex with Cullin1 with Grk5.

294 Cand proteins selectively bind to the unneddylated pool of Cullin1, thus affecting SCF  
295 ubiquitin ligase complex (Liu *et al*, 2002). Thus, we sought to determine the effect of Cand2 on  
296 the overall neddylation status of Cullin1 in cardiomyocytes overexpressing and depleted of  
297 Cand2 (**Fig. 7A and B**). Neddylated Cullin1 migrates slower during electrophoresis and can,  
298 therefore, be distinguished from unneddylated Cul1. Manipulation of Cand2 expression affected  
299 only the neddylated Cul1 levels, whereas the unneddylated fraction remained unchanged. The  
300 amount of neddylated Cul1 was slightly but significantly increased when Cand2 was silenced  
301 and reduced in Cand2 overexpressing cells, suggesting that Cand2 may regulate Cul1 activity  
302 (**Fig. 7A-B**).

303 In line with previous reports (Zou *et al*, 2019), inhibition of neddylation by using a  
304 specific inhibitor (MLN4924) was sufficient to induce cardiomyocyte hypertrophy, which was  
305 completely blocked by Cand2 knock-down (**Fig. 7C**). Interestingly, we found that MLN4924  
306 mediated inhibition of Cul1 neddylation alone was sufficient to induce an approximately 2.5-  
307 fold increase of Grk5 protein levels, independent from transcript levels measured by RT-qPCR  
308 (**Fig. 7D**). The deneddylation of Cul1 by MLN4924 led to approximately 2.5-fold increase of  
309 Grk5 protein, independently from transcript levels measured by RT-qPCR. This induction was  
310 largely attenuated after Cand2 knock-down, indicating that Cand2 is required for the induction  
311 of Grk5 after neddylation inhibition (**Fig. 7D**). Additionally, neddylation inhibition did not affect  
312 Cand2 transcript levels (**EV5**). Neither Cand2 knock-down nor overexpression influenced Cul1  
313 mRNA levels, indicating that Cand2 interacts with Cul1 on the protein level (**EV5**). To show  
314 that Cand2 regulates Grk5 protein stability, we assessed Grk5 half-life in cycloheximide chase  
315 assay (**Fig. 7E**). The Grk5 protein half-life was prolonged from approximately 18 to 27 hours  
316 when Cand2 was overexpressed suggesting that Grk5 is stabilized by Cand2.

317 Similar to neddylation inhibition, knock-down of Cul1 increased Grk5 protein amount by  
318 2-folds (**Fig. 7F**). This strongly suggests that Grk5 degradation is mediated by Cullin–RING E3  
319 ubiquitin ligase complex. Quantitative RT-PCR analysis revealed that all changes in Grk5  
320 levels caused by MLN4924 treatment or Cand2/Cul1 silencing resulted independent from  
321 transcriptional changes (**Fig. 7D-F**).

322 Finally, to confirm that Cand2 affects cell size through Grk5, we examined whether  
323 Grk5 re-expression is sufficient to rescue the decreased cell size phenotype of Cand2-deficient  
324 cardiomyocytes. Grk5 overexpression was confirmed by immunoblot and was also functional  
325 in Cand2 knock-out cells (**Fig. 7G**). While Cand2 knock-down again attenuated the  
326 hypertrophic growth response of cardiomyocytes, Grk5 overexpression was sufficient to  
327 restore hypertrophic cell growth to similar levels of control cardiomyocytes treated with PE.  
328 Taken together, we suggest a novel myocyte-specific and mTORC1-mediated signaling  
329 cascade. mTORC1-dependent, control of Cand2 expression results in activation of the pro-  
330 hypertrophic Grk5-HDAC4-MEF2 axis *via* post-transcriptional regulation of Grk5 protein levels  
331 by the Cul1-SCF ubiquitin ligase complex (**Fig. 7H**).

332  
333  
334  
335

## 336 Discussion

337 This study provides evidence for a novel role of Cand2, a component of the SCF (SKP1-  
338 Cul1-F-box protein) E3 ubiquitin ligase complex, in the myocardium. Cand2 is a muscle-  
339 specific protein that we identified in a cardiomyocyte genome-wide screen for mTORC1-  
340 dependent gene expression control at the level of mRNA translation. Several studies and our  
341 own work showed that mTORC1-signaling controls physiological as well as pathological  
342 myocardial remodeling (Sciarretta *et al*, 2018; Völkens *et al*, 2014, 2013). The central role of  
343 mTORC1 in integrating multiple intra- and extracellular parameters requires an elaborate  
344 control system to accomplish fine-tuning of signaling to downstream targets. Clinically,  
345 targeting mTORC1 with rapamycin is already an established application to prevent re-stenosis  
346 after percutaneous coronary stent implantation. Systemic pharmacological or genetic  
347 mTORC1 inhibition prevented pathological hypertrophy and improved cardiac function in  
348 murine disease models (Buss *et al*, 2009; Shioi *et al*, 2003; Völkens *et al*, 2013). Still, the  
349 identity of mTORC1 translationally regulated mRNAs in the diseased heart were largely  
350 unknown.

351 Cand2 is a translationally upregulated gene dependent on the activity of mTORC1 during  
352 pathological stress both *in vitro* and *in vivo*, whereas Cand2 expression is not regulated during  
353 physiological stress. We found that Cand2 is required for pathological hypertrophy in  
354 cardiomyocytes by upregulation of the kinase Grk5 which is associated with the induction of  
355 pathological gene expression profiles. Indeed, Cand2 knock-out mice were protected against  
356 pathological remodeling, and cardiac dysfunction, which was associated with reduced levels  
357 of Grk5 and MEF2-dependent gene expression profiles. Conversely, overexpression of Cand2  
358 was sufficient to drive pathological hypertrophy and gene expression *in vitro*. Cand2  
359 expression was also found to be upregulated in human cardiomyopathy patients (van Heesch  
360 *et al*, 2019).

361 Cand2 was initially identified as a muscle-specific homolog of Cand1 and its only described  
362 function was the acceleration of myogenesis in skeletal myoblasts during differentiation (Aoki  
363 *et al*, 1999; Shiraishi *et al*, 2007). Interestingly, Cand2 has been linked to atrial fibrillation  
364 susceptibility using expression quantitative trait loci mapping, suggesting that it might play an  
365 important role in atrial myocytes as well. Increased levels of Cand2 correlated with a higher  
366 incidence of atrial fibrillation (Sinner *et al*, 2014; Wei *et al*, 2016; Gregers *et al*, 2017),  
367 suggesting that Cand2 might drive pathological remodeling in the atrium.

368 Mechanistically, Cand proteins modulate the activity of Cullin–RING E3 ubiquitin ligases  
369 (CRLs). The substrate-binding domain of Cullins, through their adaptors, can recruit hundreds  
370 of known substrate receptors that specifically target an even larger array of substrates. It has  
371 become increasingly evident that the cardiac ubiquitin-proteasomal function is not only highly  
372 dynamic but is also critical for healthy myocardium (Drews & Taegtmeier, 2014). Just as CRLs  
373 regulate protein levels and function by covalent modification, they are subjected to  
374 modifications at the posttranslational level, which in turn regulate ligase activity. NEDD8, a  
375 ubiquitin-like protein, is covalently attached to a conserved lysine residue in the C-terminal  
376 Cullin homology domain. The activity of CRLs is largely dependent on Cullin neddylation,  
377 whereby Nedd8 induces conformational rearrangement of Cullins. Cand proteins have been  
378 shown to interact with and sequester unneddylated Cullins (Liu *et al*, 2018). Thus, Cand  
379 proteins have been initially characterized as inhibitors of Nedd8 conjugation, which initially  
380 implied that Cand proteins are negative regulators of CRLs. However, subsequent studies of  
381 Cand1 deficient cells and organisms suggested also a positive regulatory function of Cand on  
382 CRLs (Liu *et al*, 2018). Importantly, neddylation homeostasis is crucial for the integrity of the  
383 heart. Complete loss of neddylation in cardiac myocytes resulted in dilated cardiomyopathy  
384 with premature death (Su *et al*, 2013, 2011). Pharmacological inhibition of neddylation using a  
385 selective neddylation inhibitor MLN4924 promoted pathological hypertrophy and resulted in  
386 cardiac failure (Zou *et al*, 2018, 2019).

387 Neddylation of Cullins can provide a regulatory mechanism that fine-tunes substrate  
388 ubiquitination and targeting for proteasomal degradation. We found that Cand2 regulates



389 protein levels of Grk5 predominantly independent of the transcript level. Previous work showed  
390 that following pressure overload, Grk5 accumulated in the nucleus of cardiomyocytes and acts  
391 in the nucleus as a class II histone deacetylase (HDAC) kinase, phosphorylating specifically  
392 HDAC5 leading to its nuclear export and de-repression of the transcription factor MEF2 as well  
393 as NFAT (Cannavo *et al*, 2016; Traynham *et al*, 2016). Furthermore, transgenic mice with Grk5  
394 cardiac overexpression could not cope with pressure overload (Martini *et al*, 2008). Once free  
395 of repression, MEF2 and NFAT are responsible for the transcription of hypertrophic genes  
396 which leads to pathological hypertrophy (Zhang *et al*, 2011).

397 Here we found that reduced levels of Grk5 in Cand2 depleted myocytes resulted in  
398 decreased MEF2 activity. We also confirmed the direct interaction of Cand2 with Cullin1 and  
399 Grk5 in myocytes, supporting the hypothesis that Cand2 controls Cullin1-dependent Grk5  
400 levels in cardiomyocytes. Moreover, pharmacological inhibition of neddylation using a selective  
401 neddylation inhibitor MLN4924 resulted in loss of Cullin1 neddylation and increased cell size,  
402 which was associated with increased Grk5 levels independent from transcript levels.  
403 Cardiomyocytes depleted of Cand2 did not respond to MLN4924, suggesting that Cand2 is  
404 necessary for growth induction caused by MLN4924. Rescue of Grk5 expression in Cand2  
405 depleted cells reversed the observed phenotype with increased pathological cell size similar  
406 to control cells.

407 Taken together, we suggest a novel mechanism by which pathological mTORC1 signaling  
408 links translationally-controlled Cand2 expression to transcriptional activity (mRNA translation  
409 controls transcriptional activity). We suggest that these findings might be transferable toward  
410 novel treatment options. We hypothesize that Cand2 is a promising target as it is a cardiac  
411 muscle-specific protein, early (translationally) upregulated during disease initiation, and  
412 sufficient for pathological remodeling. Future studies will develop a nucleic acid-based therapy  
413 against Cand2. Recent advances in nucleic acid-based therapeutics show promising results in  
414 treatments for various diseases including pathological cardiac hypertrophy and it should be  
415 possible to target Cand2 translation by antisense oligonucleotides targeting the 5' UTR of  
416 Cand2 (Moriyama *et al*, 2017). Future studies are also needed to identify additional interaction  
417 partners of Cand2 dependent on the neddylation status of Cullin1 to understand how  
418 mTORC1-dependent upregulation of Cand2 affects the stability of protein networks in the  
419 nucleus.

420

## 421 **Material and Methods**

422 The authors declare that all supporting data are available within the article (and in the Online  
423 Data Supplement).

424 Raw sequencing data have been made publicly available and can be accessed. RNA-Seq:  
425 Raw data have been uploaded to GEO (accession ID: GSE153364)

426 Ribo-Seq: Raw data have been uploaded to SRA (accession ID:SRP156230)

427

428

## 429 **Parallel Generation of Ribo-seq and RNA-seq Libraries**

430 Ribo-seq and RNA-seq libraries were prepared for each biological replicate. Ribosome  
431 footprints were generated after immunoprecipitation of cardiac myocyte-specific monosomes  
432 with anti-HA magnetic beads after treating the lysate with RNase I. Libraries were generated  
433 according to the mammalian Ribo-seq kit (Illumina). Barcodes were used to perform multiplex  
434 sequencing and create sequencing pools containing at least eight different samples and  
435 always an equal amount of both RNA and RPF libraries. Sample pools were sequenced on the  
436 HiSeq 2500 platform using 50-bp sequencing chemistry.

437 The Ribo-Taq mouse model and ribosome-protected fragments immunoprecipitation were  
438 described previously (Doroudgar *et al*, 2019). To identify mTOR-dependent translome *in vitro*  
439 polysome fractionations from NRCMs were isolated in a sucrose gradient according to  
440 standard procedure (Kmietczyk *et al*, 2019). The absorbance was monitored at 254 nm to

441 record the polysome profile. The collected fractions were treated with RNase1 and mixed with  
442 Qiazol to recover ribosomal footprints. Generation of Ribo- and RNA-seq libraries and deep-  
443 sequencing data processing were described in detail(Doroudgar *et al*, 2019). Briefly, 15 Million  
444 NRCMs were lysed in 500 $\mu$ l polysome buffer (20 mM Tris pH 7.4, 10 mM MgCl, 200 mM KCl,  
445 2 mM DTT, 100  $\mu$ g/ml CHX, 1% Triton X-100, 1U DNase/ $\mu$ l) containing 100  $\mu$ g/ml CHX. The  
446 lysate was used for RPF generation using polysome profiles after RNase1 digestion. For  
447 complete lysis, the samples were kept on ice for 10 min and subsequently centrifuged at  
448 20,000 $\times$ g to precipitate cell debris and the supernatant was immediately used in the further  
449 steps. Sucrose solutions were prepared in polysome gradient buffer and 20 U/mL SUPERase-  
450 In (Ambion). Sucrose density gradients (10–50% wt/vol) were freshly made in SW40  
451 ultracentrifuge tube using a BioComp Gradient Master (BioComp). Ribosome footprints were  
452 generated after treating the lysate with RNase I (Ambion). Cell lysates were loaded onto  
453 sucrose gradients, followed by centrifugation for 250 min at 220,000 $\times$ g, 4 °C, in an SW40 rotor.  
454 Separated samples were fractionated at 0.375 ml/min by using a fractionation system  
455 BioComp Gradient Station (BioComp) that continually monitors OD254 values. Monosomal  
456 fractions were collected into tubes at 0.3 mm intervals. Libraries were generated according to  
457 the mammalian Ribo-seq kit (Illumina). Sample pools were sequenced on the HiSeq 2000  
458 platform using 50-bp sequencing chemistry.

#### 459 **Data analysis and visualization.**

460 For RNA-Seq R and Bioconductor was used with the NGS analysis package systempipeR  
461 (Backman & Girke, 2016). Quality control of raw sequencing reads was performed using  
462 FastQC. Low-quality reads were removed using trim\_galore (version 0.6.4). The resulting  
463 reads were aligned to mouse genome version mm10 from UCSC using tophat2 (Kim *et al*,  
464 2013). EdgeR (version 3.26.8) was used to perform a differential expression analysis  
465 (Robinson *et al*, 2010). A false-positive rate of  $\alpha = 0.05$  with FDR correction was taken as the  
466 level of significance. Volcano plots were created using R (version 3.4.0) using the ggplot2  
467 package (version 2.2.1).

468 For Ribo-seq data, only periodic fragment lengths were kept that showed a distinctive triplet  
469 periodicity. We used the automatic Bayesian selection of read lengths and ribosome P-site  
470 offsets (BPPS) method (Malone *et al*, 2016) to select and shift aligned reads to properly  
471 account for the P-site of the ribosome. We only consider data points with read count  
472 observations across all replicates. We used  $\log_2 F_c > 1.5$  as a cutoff. For the myocytes data we  
473 do not estimate significance but provide only fold change values due to the absence of  
474 biological replicates.

475 GO-term enrichment analysis was performed using DAVID (Database for Annotation,  
476 Visualization and Integrated Discovery) with the rat genome as background. Only enriched GO  
477 terms with at least three significantly changed genes were kept for further analysis and ranked  
478 by Fisher Exact. Top enriched terms were retained and visualized with a custom plotting  
479 routine showing enrichment p-value.

#### 480 **Mice, Surgery, and cardiac function**

481 To study Cand2 *in vivo*, a novel Cand2 knock-out mouse line was created. An embryonic stem  
482 cell clone (EPD0169\_1\_A01-European Conditional Mouse Mutagenesis Program) was used  
483 to generate Cand2 knock-out mice. At 8 weeks of age, male Cand2<sup>-/-</sup> mice underwent  
484 transverse aortic constriction (TAC; 27 gauge needle) or sham operation, as previously  
485 described (Kmietczyk *et al*, 2019;). Institutional Animal Care and Use Committee approval was  
486 obtained for all animal studies.

#### 488 **Isolation and primary culture of neonatal and adult ventricular cardiomyocytes and 489 neonatal mouse cardiomyocytes.**

490 Ventricular cardiomyocytes from 1 to 2 day old Wistar rats neonatal hearts (NRCMs) were  
491 prepared by trypsin digestion and percoll gradient separation according to standard  
492 procedures (Sanlialp *et al*, 2020). For analysis of hypertrophy, cells were treated with 50 uM  
493 PE for indicated time points. mTORC1 was pharmacologically inhibited with 250 nM Torin1 for

494 24h. For neddylation inhibition NRCMs were treated with 100 nM MLN4924 for 24h. Neonatal  
495 mouse heart myocytes were isolated from 1-day old wild-type and Cand2 knock-out mice by  
496 DNaseI/collagenase type III digestion according to the published protocol (Ehler *et al*, 2013).  
497 Adult ventricular cardiomyocytes were isolated using standard procedures as previously  
498 described (Kmietczyk *et al*, 2019).

#### 499 **Plasmids and overexpressions.**

500 5'TOP-reporter constructs were obtained by cloning of Cand2, eEF2, and -Actin 5'UTRs into  
501 piCheck2 plasmid upstream of Renilla luciferase. HEK cells were transfected with 5'UTR-  
502 reporters for 24h using ViaFect reagent according to the manufacturer's protocol (Promega).  
503 Next, HEK cells were treated with 250 nM Torin1 for 6h. Cand2 overexpression *in vitro* was  
504 obtained by NRCMs transduction with AAV6 vector. Mouse Cand2 (NM\_025958.2) containing  
505 Myc-tag inserted after START codon was chemically synthesized (BioCat) and cloned into  
506 recipient vector pSSV9. To determine the optimal MOI, a preliminary dose-escalation  
507 experiment was conducted with different doses of Cand2 AAV6. For MEF2 and Grk5 studies,  
508 NRCMs were infected with adenoviruses harboring 3xMEF-luc (Firefly luciferase; a gift from  
509 Prof. Johannes Backs) and bovine Grk5 (gift from Prof. Philip Raake) for 24h.

#### 510 **RNA interference.**

511 Pre-designed synthetic anti-rat Cand2 small interfering RNA (siRNA ID s140407), anti-Cul1  
512 siRNA (s168977), anti-Rptor siRNA (s143005) and scrambled siRNA (Silencer™ Select  
513 Negative Control No. 1 siRNA) as negative control were purchased in Thermo Fisher Scientific.  
514 NRCMs were transfected with 25 nM final concentration of siRNAs by using HiPerfect  
515 transfection reagent according to the manufacturer's instructions (QIAGEN).

#### 516 **RNA isolation and RT-qPCR.**

517 Total RNA from NRCMs was isolated with Quick-RNA™ MiniPrep (Zymo Research) according  
518 to the manufacturer's protocol. Liquid nitrogen snap-frozen tissues were homogenized in  
519 Precellys 24 homogenizer (Bertin Instruments) in 500 ul of lysis buffer containing 20 mM Hepes  
520 pH 7.4-7.5, 10 mM MgCl<sub>2</sub>, 200 mM KCl, 1% Triton, 1x protease inhibitor, 1x phosphatase  
521 inhibitor, 25 U/μl DNase I and 40U of RNasin. A 100ul aliquot was mixed with 1ml of Qiazol to  
522 isolate total RNA according to the standard protocols with chloroform and isopropanol  
523 precipitation. The quality of total RNA was checked on a NanoChip 2100 Bioanalyzer (Agilent).  
524 100-500 ng of total RNA was reverse-transcribed into complementary DNA (cDNA) by using  
525 iScript™ Reverse Transcription Supermix (Biorad). Quantitative real-time PCR was performed  
526 using iTAQ™ SYBR Green PCR Kit (Biorad) according to the manufacturer's instructions.  
527 Primers used in the study are shown in supplementary Table 1. Analysis of the specificity of  
528 the amplification product was performed by melting curve analysis. We calculated quantitative  
529 differences using the  $\Delta\Delta C(T)$  method.

#### 530 **Immunoblots**

531 Samples were combined with the appropriately concentrated form of Laemmli sample buffer  
532 and then boiled before SDS-PAGE followed by transfer to PVDF membranes.  
533 A list of all used antibodies is provided in Table 2.

534

#### 535 **Histology, immunohistochemistry, and PLA.**

536 Sections were cut and deparaffinized using standard procedures. In brief, hearts were excised  
537 and embedded in formalin for 24 hours at room temperature. After cutting, sections were  
538 deparaffinized, rehydrated and antigens were *retrieved*.

539 NRCMs and ARCMs were plated on permanox or glass chamber slides (gelatin coated) and  
540 fixed by paraformaldehyde, permeabilized and blocked as described (Völkers *et al*, 2013).  
541 Cand2 primary antibody (Bethyl Laboratories) diluted 1:100 vol/vol in the respective blocking  
542 solution was applied to both types of slides overnight at 4°C. Cand2 was detected by FITC or  
543 Cy3-conjugated secondary antibody (Jackson Laboratories). Alexa Fluor™ 555 Phalloidin  
544 (Thermo Fisher Scientific) or conjugated phalloidin 633 (Jackson Laboratories) was used to

545 detect F-actin. DAPI (Life Technologies) was diluted in Vectashield (Vectra Labs) mounting  
546 media and used as nuclear staining.  
547 Proximity ligation assay was performed according to the manufacturer's instructions (DuoLink  
548 in situ red kit Mouse/Rabbit) in rat and mouse neonatal cardiomyocytes. Primary antibodies  
549 were diluted 1:20 in DuoLink antibody diluent and incubated with cells at 4°C overnight. For  
550 Cand2-Grk5 detection anti-rabbit TIP120B and anti-mouse Grk5 were used. For Cand2-Cul1  
551 anti-mouse TIP120B and anti-rabbit Cul1 antibodies were applied. The connective tissue was  
552 visualized with WGA Alexa Fluor™ 488 conjugate (Thermo Fisher Scientific). Images were  
553 obtained with 20x and 60x objectives.  
554

#### 555 **Immunoprecipitation.**

556 NRCMs were treated with 1uM MLN 4924 for 6h and lysed with ice-cold IP lysis buffer  
557 containing 40 mM Hepes pH 7.4, 2 mM EDTA, 10 mM sodium pyrophosphate, 10 mM  
558 glycerophosphate, and 0.3% CHAPS. M280 sheep anti-rabbit Dynabeads were coated with  
559 anti-rabbit TIP120B antibody in IP lysis buffer for 1h at room temperature. 500 ug of protein  
560 lysate was combined with antibody-coated beads and rotated at 4°C overnight. Beads were  
561 washed three times with IP lysis buffer supplemented with 150 mM NaCl. Immunocomplexes  
562 were eluted with SDS sample buffer by boiling for 5 min, and proteins were detected by  
563 immunoblotting with a corresponding antibody.

#### 564 **Subcellular fractionation.**

565 Subcellular fractionation of C2C12 cells and left ventricles was performed as previously  
566 described with small modifications (Wysocka *et al*, 2001). Briefly, cells and tissues were  
567 washed with ice-cold PBS and homogenized in buffer A (10 mM Hepes pH 7.9, 10 mM KCl,  
568 1.5 mM MgCl<sub>2</sub>, 340 mM sucrose, 10% glycerol, 1 mM DTT, 1x proteases inhibitor cocktails, 1X  
569 Triton) with tight-fitting disposable tissue grinder pestle and needled with 20 and 22 gauge  
570 needles. Nuclear pellets and cytoplasmic supernatants were separated by low-speed  
571 centrifugation at 1 300 x g, 4°C for 5 min. The final cytoplasmic fraction was pre-cleared by  
572 high-speed centrifugation at 20 000 x g for 5 min at 4°C. The nuclear pellet from low-speed  
573 centrifugation was dissolved in the hypotonic buffer B containing 3 mM EDTA, 0.2 mM EGTA,  
574 1 mM DTT, 1x proteases inhibitor cocktails.

#### 575 **Luciferase Assays.**

576 Cells were harvested 24–48 h after transfection/infection in passive lysis buffer (Promega).  
577 The samples were prepared according to the manufacturer's protocol (Promega) and  
578 measured by using a LUMIstar OPTIMA plate reader. Luciferase's signals were normalized to  
579 total protein amount determined with RC-DC kit (BioRad).

#### 580 **Table 1. List of primers**

| Gene               | Forward (5'-3')           | Reverse (5'-3')             |
|--------------------|---------------------------|-----------------------------|
| Rat Nppa           | TACAGTGCGGTGTCCAACACAGAT  | TGGGCTCAATCCTGTCAATCCTA     |
| Rat Nppb           | GAACAATCCATGATGCAGAAGC    | GCTGTCTCTGAGCCATTTCTT       |
| Rat Grk5           | CTCTTCAGGCGTCAGCATCA      | AGGCCAGAGCTGAAACTAGC        |
| Rat Cand2          | CAAAGACTTCAGGTTTCATGGCTAC | GTTCTGCACCTCACCCTCC         |
| Rat Nr4a1          | CTTCAAACCCAAGCAGCCC       | CTTCAAACCCAAGCAGCCC         |
| Rat Xirp2          | TGCCTACAAACCTCAGACG       | ACAGTTTCACTCAAAAAGGCCA<br>A |
| Rat Raptor         | AGAGCTGGAGAATGAAGGATCG    | AGGACCCATAGACAGAGGATCAAT    |
| Rat, mouse<br>HPRT | GGGGCTGTACTGCTTAACCAG     | TCAGTCAACGGGGGACATAAA       |
| Mouse Cand2        | GGGCAAGGTGAAGGAGTACC      | TGGTGAGTTGGCCTGTGATC        |
| Rat, mouse 18S     | CGAGCCGCCTGGATAACC        | CATGGCCTCAGTTCCGAAAA        |
| Mouse Grk5         | CTCCGAAGGACCATAGACAGAG    | CGCCCCAAGGTTTTTCATCTG       |
| Mouse Xirp2        | GCAGCTTCTCGGCTAATGTCA     | CTCAGAAAAGGCGTTGCAGG        |

|              |                        |                       |
|--------------|------------------------|-----------------------|
| Mouse Nppa   | TTGTGGTGTGTCACGCAGCT   | TGTTACCACGCCACAGTG    |
| Mouse Nppb   | TTTGGGCTGTAACGCACTG    | CACTTCAAAGGTGGTCCCAGA |
| Mouse Cand1  | GACGACGATGACCAAGGGAG   | TAACTACAGCGTCCAGGCAC  |
| Mouse Desmin | AGTGCATGAAGAGGAGATCCG  | GTTCTTAGCCGCGATGGTCT  |
| Mouse 4EBP1  | ACTCACCTGTGGCCAAAACA   | TTGTGACTCTTCACCGCCTG  |
| Bovine Grk5  | CTGTTAGACGATTACGGCCACA | GGAGCCATGTAGCCAACGG   |

581 **Table 2. List of primary antibodies**

| Antigen        | Primary antibody   | Origin | Company             | Cat.#       | Application     |
|----------------|--------------------|--------|---------------------|-------------|-----------------|
| Cand2          | TIP120B            | Rabbit | Bethyl Laboratories | A304-046A-M | WB, IP, IF, PLA |
| Cand2          | TIP120B (H7)       | Mouse  | Santa Cruz          | sc-515406   | WB, PLA         |
| Grk5           | Grk5 (D9)          | Mouse  | Santa Cruz          | sc-518005   | WB, PLA         |
| Cul1           | Cul1 (D5)          | Mouse  | Santa Cruz          | sc-17775    | WB, PLA         |
| Cul1           | Cul1               | Rabbit | Bethyl Laboratories | A303-373A-M | WB, PLA         |
| GAPDH          | GAPDH (G9)         | Mouse  | Santa Cruz          | sc-365062   | WB              |
| $\beta$ -Actin | Beta-Actin (C4)    | Mouse  | Santa Cruz          | sc-47778    | WB              |
| pRib6S         | pS6RP (Ser235/236) | Rabbit | Cell Signaling      | 4858S       | WB              |
| p4E-BP1        | p4E-BP1 (Ser65)    | Rabbit | Cell Signaling      | 9451S       | WB              |
| 4E-BP          | 4E-BP              | Rabbit | Cell Signaling      | 9452        | WB              |
| pERK 1/2       | Thr218/Tyr220      | Rabbit | Cell Signaling      | 3371        | WB              |
| Myc-Tag        | (71D10)            | Rabbit | Cell Signaling      | 2278S       | WB              |
| pAkt1          | Ser473             | Rabbit | Cell Signaling      | 9271        | WB              |
| Csq            | calsequestrin      | Rabbit | abcam               | Ab3516      | WB              |
| rpS5           | rpS5               | Rabbit | abcam               | Ab210745    | WB              |
| Lamin B1       | Lamin B1 (B10)     | Mouse  | Santa Cruz          | sc-374015   | WB              |
| Histone1 H3D   | Histone1 H3D       | Mouse  | Santa Cruz          | sc-134355   | WB              |
| Cul4           | Cul4 (H11)         | Mouse  | Santa Cruz          | sc-377188   | WB              |
| Des            | Desmin             | Rabbit | Abcam               | ab15200     | WB              |
| eEF2           | eEF2               | Rabbit | Cell Signaling      | 2332s       | WB              |
| rpS20          | rpS20              | Rabbit | Abcam               | ab133776    | WB              |

582

583

### Statistics

584

*In vivo* experiments were performed on 3-20 biological replicates (mice) for each treatment.

585

Throughout the studies, the investigators were blinded to the sample group allocation during

586

the experiment and analysis of the experimental outcome. Statistical analysis was performed

587

using GraphPad Prism 7.0 (Graphpad Software Inc; [www.graphpad.com](http://www.graphpad.com)) or R.

588

All the data sets were tested for normality of distribution using the Shapiro-Wilks test (threshold

589

$P < 0.05$ ). For normally distributed data, values shown are mean  $\pm$  SEM. Statistical analysis of

590

data involving two groups was performed using unpaired two-tailed t-test, for more than two

591

groups 1-way ANOVA with the Bonferroni test applied to correct for multiple

592

comparisons. Sequencing count data were modeled using negative-binomial distribution.

593

For not normally distributed data a nonparametric test was used to test for significance

594

between different groups. A Mann-Whitney test was performed when comparing two groups.

595

A Kruskal-Wallis test was used when comparing multiple groups (more than two) followed by

596

a Dunn's multiple test comparison.

597 **Data Availability Section**

598 Raw sequencing data have been made publicly available and can be accessed.

599

600 RNA-Seq: Raw data have been uploaded to GEO (accession ID: GSE153364)

601 Ribo-Seq: Raw data have been uploaded to SRA (accession ID:SRP156230)

602

603 **Acknowledgements**

604 A.A.G., H.A.K., M.V., S.D., and C.D. acknowledge the DZHK (German Center for  
605 Cardiovascular Research) Partner Site Heidelberg/Mannheim. C.D. acknowledges funding  
606 from the Klaus-Tschira Stiftung GmbH. S.D. acknowledges the European Society of  
607 Cardiology Basic Research Fellowship and the DZHK Excellence Programme. M.V.  
608 acknowledges the DFG (German Research Foundation, DFG VO 1659 2/1, DFG VO 1659 2/2,  
609 DFG VO 1659 4/1, DFG VO 1659 6/1), the Boehringer Ingelheim Foundation (Plus 3  
610 Programme).

611 **Disclosures**

612 All authors declare no competing financial interests.

613

614 **References:**

615 Aoki T, Okada N, Ishida M, Yogosawa S, Makino Y & Tamura TA (1999) TIP120B: A novel  
616 TIP120-family protein that is expressed specifically in muscle tissues. *Biochem Biophys*  
617 *Res Commun*

618 Avni D, Biberman Y & Meyuhas O (1996) The 5' Terminal Oligopyrimidine Tract Confers  
619 Translational Control on Top Mrnas in a Cell Type-and Sequence Context-Dependent  
620 Manner. *Nucleic Acids Res* 25: 995–1001

621 Backman TWH & Girke T (2016) systemPipeR: NGS workflow and report generation  
622 environment. *BMC Bioinformatics* 17: 388

623 Buss SJ, Muenz S, Riffel JH, Malekar P, Hagenmueller M, Weiss CS, Bea F, Bekeradjian R,  
624 Schinke-Braun M, Izumo S, *et al* (2009) Beneficial Effects of Mammalian Target of  
625 Rapamycin Inhibition on Left Ventricular Remodeling After Myocardial Infarction. *J Am*  
626 *Coll Cardiol* 54: 2435–2446

627 Cannavo A, Liccardo D, Eguchi A, Elliott KJ, Traynham CJ, Ibeti J, Eguchi S, Leosco D,  
628 Ferrara N, Rengo G, *et al* (2016) Myocardial pathology induced by aldosterone is  
629 dependent on non-canonical activities of G protein-coupled receptor kinases. *Nat*  
630 *Commun* 7

631 Doroudgar S, Hofmann C, Boileau E, Malone B, Riechert E, Gorska AA, Jakobi T,  
632 Sandmann C, Jürgensen L, Kmietczyk V, *et al* (2019) Monitoring cell-Type-specific gene  
633 expression using ribosome profiling in vivo during cardiac hemodynamic stress. *Circ*  
634 *Res* 125: 431–448

635 Drews O & Taegtmeyer H (2014) Targeting the ubiquitin-proteasome system in heart  
636 disease: The basis for new therapeutic strategies. *Antioxidants Redox Signal* 21: 2322–  
637 2343 doi:10.1089/ars.2013.5823 [PREPRINT]

638 Ehler E, Moore-Morris T & Lange S (2013) Isolation and culture of neonatal mouse  
639 cardiomyocytes. *J Vis Exp*

640 Furukawa M, Zhang Y, McCarville J, Ohta T & Xiong Y (2000) The CUL1 C-Terminal  
641 Sequence and ROC1 Are Required for Efficient Nuclear Accumulation, NEDD8  
642 Modification, and Ubiquitin Ligase Activity of CUL1. *Mol Cell Biol* 20: 8185–8197

- 643 Gold JI, Martini JS, Hullmann J, Gao E, Chuprun JK, Lee L, Tilley DG, Rabinowitz JE,  
644 Bossuyt J, Bers DM, *et al* (2013) Nuclear Translocation of Cardiac G Protein-Coupled  
645 Receptor Kinase 5 Downstream of Select Gq-Activating Hypertrophic Ligands Is a  
646 Calmodulin-Dependent Process. *PLoS One* 8
- 647 Goldenberg SJ, Cascio TC, Shumway SD, Garbutt KC, Liu J, Xiong Y & Zheng N (2004)  
648 Structure of the Cand1-Cul1-Roc1 complex reveals regulatory mechanisms for the  
649 assembly of the multisubunit cullin-dependent ubiquitin ligases. *Cell* 119: 517–528
- 650 Gregers E, Ahlberg G, Christensen T, Jabbari J, Larsen KO, Herfelt CB, Henningsen KM,  
651 Andreasen L, Thiis JJ, Lund J, *et al* (2017) Deep sequencing of atrial fibrillation patients  
652 with mitral valve regurgitation shows no evidence of mosaicism but reveals novel rare  
653 germline variants. *Heart Rhythm* 14: 1531–1538
- 654 van Heesch S, Witte F, Schneider-Lunitz V, Schulz JF, Adami E, Faber AB, Kirchner M,  
655 Maatz H, Blachut S, Sandmann CL, *et al* (2019) The Translational Landscape of the  
656 Human Heart. *Cell* 178: 242-260.e29
- 657 Hsieh AC, Liu Y, Edlind MP, Ingolia NT, Janes MR, Sher A, Shi EY, Stumpf CR, Christensen  
658 C, Bonham MJ, *et al* (2012) The translational landscape of mTOR signalling steers  
659 cancer initiation and metastasis. *Nature* 485: 55–61
- 660 Huang HT, Brand OM, Mathew M, Ignatiou C, Ewen EP, McCalmon SA & Naya FJ (2006)  
661 Myomaxin Is a novel transcriptional target of MEF2A that encodes a Xin-related  $\alpha$ -  
662 actinin-interacting protein. *J Biol Chem* 281: 39370–39379
- 663 Iadevaia V, Zhang Z, Jan E & Proud CG (2012) MTOR signaling regulates the processing of  
664 pre-rRNA in human cells. *Nucleic Acids Res* 40: 2527–2539
- 665 Ingolia NT, Ghaemmaghami S, Newman JRS & Weissman JS (2009) Genome-wide analysis  
666 in vivo of translation with nucleotide resolution using ribosome profiling. *Science* (80- )  
667 324: 218–223
- 668 Jefferies HBJ, Reinhard C, Kozma SC & Thomas G (1994) Rapamycin selectively represses  
669 translation of the 'polypyrimidine tract' mRNA family. *Proc Natl Acad Sci U S A* 91:  
670 4441–4445
- 671 Johnson LR, Scott MGH & Pitcher JA (2004) G Protein-Coupled Receptor Kinase 5 Contains  
672 a DNA-Binding Nuclear Localization Sequence. *Mol Cell Biol* 24: 10169–10179
- 673 Kim D, Pertea G, Trapnell C, Pimentel H, Kelley R & Salzberg SL (2013) TopHat2: Accurate  
674 alignment of transcriptomes in the presence of insertions, deletions and gene fusions.  
675 *Genome Biol* 14: R36
- 676 Kmietczyk V, Riechert E, Kalinski L, Boileau E, Malovrh E, Malone B, Gorska A, Hofmann C,  
677 Varma E, Jürgensen L, *et al* (2019) M 6 A-mRNA methylation regulates cardiac gene  
678 expression and cellular growth. *Life Sci Alliance* 2: e201800233
- 679 Lehmann LH, Jebessa ZH, Kreusser MM, Horsch A, He T, Kronlage M, Dewenter M, Sramek  
680 V, Oehl U, Krebs-Hauptenthal J, *et al* (2018) A proteolytic fragment of histone  
681 deacetylase 4 protects the heart from failure by regulating the hexosamine biosynthetic  
682 pathway. *Nat Med* 24: 62–72
- 683 Liu J, Furukawa M, Matsumoto T & Xiong Y (2002) NEDD8 modification of CUL1 dissociates  
684 p120CAND1, an inhibitor of CUL1-SKP1 binding and SCF ligases. *Mol Cell* 10: 1511–  
685 1518

- 686 Liu X, Reitsma JM, Mamrosh JL, Zhang Y, Straube R & Deshaies RJ (2018) Cand1-  
687 Mediated Adaptive Exchange Mechanism Enables Variation in F-Box Protein  
688 Expression. *Mol Cell* 69: 773-786.e6
- 689 Ma XM & Blenis J (2009) Molecular mechanisms of mTOR-mediated translational control.  
690 *Nat Rev Mol Cell Biol* 10: 307–318
- 691 Malone B, Atanassov I, Aeschmann F, Li X, Großhans H & Dieterich C (2016) Bayesian  
692 prediction of RNA translation from ribosome profiling. *Nucleic Acids Res* 45: 2960–2972
- 693 Martini JS, Raake P, Vinge LE, DeGeorge BR, Chuprun JK, Harris DM, Gao E, Eckhart AD,  
694 Pitcher JA & Koch WJ (2008) Uncovering G protein-coupled receptor kinase-5 as a  
695 histone deacetylase kinase in the nucleus of cardiomyocytes (Proceedings of the  
696 National Academy of Sciences of the United States of America (2008) 105, (12457-  
697 12462) DOI: 10.1073/pnas.0803153105). *Proc Natl Acad Sci U S A* 105: 17206
- 698 Min KW, Kwon MJ, Park HS, Park Y, Sungjoo KY & Yoon JB (2005) CAND1 enhances  
699 deneddylation of CUL1 by COP9 signalosome. *Biochem Biophys Res Commun* 334:  
700 867–874
- 701 Morihara H, Yamamoto T, Oiwa H, Tonegawa K, Tsuchiyama D, Kawakatsu I, Obana M,  
702 Maeda M, Mohri T, Obika S, *et al* (2017) Phospholamban Inhibition by a Single Dose of  
703 Locked Nucleic Acid Antisense Oligonucleotide Improves Cardiac Contractility in  
704 Pressure Overload-Induced Systolic Dysfunction in Mice. *J Cardiovasc Pharmacol Ther*  
705 22: 273–282
- 706 Poulin F, Gingras AC, Olsen H, Chevalier S & Sonenberg N (1998) 4E-BP3, a new member  
707 of the eukaryotic initiation factor 4E-binding protein family. *J Biol Chem* 273: 14002–  
708 14007
- 709 Robinson MD, McCarthy DJ & Smyth GK (2010) edgeR: a Bioconductor package for  
710 differential expression analysis of digital gene expression data
- 711 Sanliarp A, Schumacher D, Kiper L, Varma E, Riechert E, Ho TC, Hofmann C, Kmietczyk V,  
712 Zimmermann F, Dlugosz S, *et al* (2020) Saraf-dependent activation of mTORC1  
713 regulates cardiac growth. *J Mol Cell Cardiol* 141: 30–42
- 714 Sciarretta S, Forte M, Frati G & Sadoshima J (2018) New insights into the role of mtor  
715 signaling in the cardiovascular system. *Circ Res* 122: 489–505
- 716 Shioi T, McMullen JR, Tarnavski O, Converso K, Sherwood MC, Manning WJ & Izumo S  
717 (2003) Rapamycin attenuates load-induced cardiac hypertrophy in mice. *Circulation*  
718 107: 1664–1670
- 719 Shiraishi S, Zhou C, Aoki T, Sato N, Chiba T, Tanaka K, Yoshida S, Nabeshima Y,  
720 Nabeshima Y & Tamura T (2007) TBP-interacting Protein 120B (TIP120B)/Cullin-  
721 associated and Neddylated-dissociated 2 (CAND2) Inhibits SCF-dependent  
722 Ubiquitination of Myogenin and Accelerates Myogenic Differentiation. *J Biol Chem* 282:  
723 9017–9028
- 724 Sinner MF, Tucker NR, Lunetta KL, Ozaki K, Smith JG, Trompet S, Bis JC, Lin H, Chung MK,  
725 Nielsen JB, *et al* (2014) Integrating genetic, transcriptional, and functional analyses to  
726 identify 5 novel genes for atrial fibrillation. *Circulation* 130: 1225–1235
- 727 Su H, Li J, Menon S, Liu J, Kumarapeli AR, Wei N & Wang X (2011) Perturbation of cullin  
728 deneddylation via conditional Csn8 ablation impairs the ubiquitin-proteasome system



- 729 and causes cardiomyocyte necrosis and dilated cardiomyopathy in mice. *Circ Res* 108:  
730 40–50
- 731 Su H, Li J, Osinska H, Li F, Robbins J, Liu J, Wei N & Wang X (2013) The COP9  
732 Signalosome Is Required for Autophagy, Proteasome-Mediated Proteolysis, and  
733 Cardiomyocyte Survival in Adult Mice. *Circ Hear Fail* 6: 1049–1057
- 734 Thoreen CC, Chantranupong L, Keys HR, Wang T, Gray NS & Sabatini DM (2012) A unifying  
735 model for mTORC1-mediated regulation of mRNA translation. *Nature* 485: 109–113
- 736 Traynham CJ, Hullmann J & Koch WJ (2016) ‘Canonical and non-canonical actions of GRK5  
737 in the heart’. *J Mol Cell Cardiol* 92: 196–202 doi:10.1016/j.yjmcc.2016.01.027  
738 [PREPRINT]
- 739 Uprety B, Kaja A & Bhaumik SR (2018) TOR Facilitates the Targeting of the 19S Proteasome  
740 Subcomplex To Enhance Transcription Complex Assembly at the Promoters of the  
741 Ribosomal Protein Genes. *Mol Cell Biol* 38: 1–17
- 742 Völkens M, Doroudgar S, Nguyen N, Konstandin MHH, Quijada P, Din S, Ornelas L, Thuerauf  
743 DJJ, Gude N, Friedrich K, *et al* (2014) PRAS40 prevents development of diabetic  
744 cardiomyopathy and improves hepatic insulin sensitivity in obesity. *EMBO Mol Med* 6:  
745 57–65
- 746 Völkens M, Toko H, Doroudgar S, Din S, Quijada P, Joyo AYAY, Ornelas L, Joyo E, Thuerauf  
747 DJDJ, Konstandin MHH, *et al* (2013) Pathological hypertrophy amelioration by  
748 PRAS40-mediated inhibition of mTORC1. *Proc Natl Acad Sci U S A* 110: 12661–12666
- 749 Wei T, Song J, Xu M, Lv L, Liu C, Shen J & Huang Y (2016) NEURL rs6584555 and CAND2  
750 rs4642101 contribute to postoperative atrial fibrillation: a prospective study among  
751 Chinese population. *Oncotarget* 7: 42617–42624
- 752 Wysocka J, Reilly PT & Herr W (2001) Loss of HCF-1–Chromatin Association Precedes  
753 Temperature-Induced Growth Arrest of tsBN67 Cells. *Mol Cell Biol* 21: 3820–3829
- 754 Zhang D, Contu R, Latronico MVG, Zhang JL, Rizzi R, Catalucci D, Miyamoto S, Huang K,  
755 Ceci M, Gu Y, *et al* (2010) MTORC1 regulates cardiac function and myocyte survival  
756 through 4E-BP1 inhibition in mice. *J Clin Invest* 120: 2805–2816
- 757 Zhang Y, Matkovich SJ, Duan X, Gold JI, Koch WJ & Dorn GW (2011) Nuclear effects of G-  
758 protein receptor kinase 5 on histone deacetylase 5-regulated gene transcription in heart  
759 failure. *Circ Hear Fail* 4: 659–668
- 760 Zheng N, Schulman BA, Song L, Miller JJ, Jeffrey PD, Wang P, Chu C, Koepp DM, Elledge  
761 SJ, Paganok M, *et al* (2002) Structure of the Cul1–Rbx1–Skp1–F box Skp2 SCF  
762 ubiquitin ligase complex. *Nature* 416: 703–709
- 763 Zou J, Ma W, Li J, Littlejohn R, Zhou H, Kim I man, Fulton DJR, Chen W, Weintraub NL,  
764 Zhou J, *et al* (2018) Neddylation mediates ventricular chamber maturation through  
765 repression of Hippo signaling. *Proc Natl Acad Sci U S A* 115: E4101–E4110
- 766 Zou J, Ma W, Littlejohn R, Li J, Stansfield BK, Kim IM, Liu J, Zhou J, Weintraub NL & Su H  
767 (2019) Transient inhibition of neddylation at neonatal stage evokes reversible  
768 cardiomyopathy and predisposes the heart to isoproterenol-induced heart failure. *Am J*  
769 *Physiol - Hear Circ Physiol* 316: H1406–H1416

770

771

772

773 **Figures legends.**  
774 **Figure 1. Identification of the mTORC1-dependent cardiac translome**  
775 **(A)** Experimental design of translational profiling of mTOR-dependent mRNAs *in vitro* in  
776 NRCMs. Polysomal fractions were isolated in a sucrose gradient and ribosomal footprints were  
777 recovered by ribonuclease digestion. NRCMs were treated with vehicle or Torin1 to block  
778 mTOR pathway. **(B)** Scatter plot of ribosome occupancy in Ribo-seq of cultured cardiac  
779 myocytes in response to PE and Torin 1 treatment (blue dots – mRNAs downregulated after  
780 Torin 1, red dots – upregulated mRNA. **(C)** Percentage of TOP or TOP-like containing mRNAs  
781 in total and Torin1-sensitive mRNA pools. **(D)** Transcriptional (RNA-seq) vs. Translational  
782 (Ribo-seq) control of mTOR-regulated mRNAs. **(E)** Network of enriched GO categories  
783 (biological process) among mTOR-sensitive genes into several functional groups  
784 represented by circles of different colors. Each node represents one enriched GO category  
785 with the size of the node is proportional to the number of transcripts. Edges indicate  
786 similarity (between the two connected GO categories). **(F)** Cumulative fraction of mRNAs  
787 relative to their fold change of Ribo-seq and **(G)** RNA-seq (TAC vs. sham) between all  
788 transcripts mTOR-dependent and independent transcripts two days after TAC surgery.  
789 **(H)** Immunoblot and **(I)** RT-qPCR representing levels of proteins and corresponding mRNAs  
790 with defined 5'TOP motifs 3 hours and 2 days after TAC.

791 **Figure 2. Cand2 is translationally upregulated during cardiac pathological stress.**  
792 **(A)** Venn diagram showing a group of transcripts translationally upregulated *in vivo* 2 days  
793 after TAC and regulated by mTORC1 *in vitro* in NRCMs treated with Torin1. Table with top the  
794 most translationally regulated mTOR-dependent transcripts *in vitro* after Torin1 treatment of  
795 NRCMs and *in vivo* after TAC **(B)** Scatter plot of Ribo-seq vs. RNA-seq upon NRCMs treatment  
796 of Torin1 shows Cand2 among translationally downregulated mRNAs.  
797 **(C)** Protein expression of Cand2 in NRCMs treated with PE for 3 and 24 h, and 24h of Torin1  
798 treatment. mTORC1 induction was monitored by downstream targets, p4EBP1 and pS6K  
799 proteins. rpS5 – example of mTOR-dependent mRNA used as a positive control. **(D)** Cand2  
800 mRNA levels in NRCMs treated with PE and Torin1 measured by RT-qPCR. **(E)** Scatter plot  
801 of Ribo-seq vs. RNA-seq 2 days after TAC showing an increase of Cand2 translation  
802 **(F)** Ribo-seq and **(G)** RNA-seq expression data of Cand2 in sham and TAC operated animals  
803 (CPM – count per million). **(H)** Immunoblots of Cand2 expression in left ventricles 2 days post-  
804 TAC and after mice injection with Torin1. rpS5 used as a positive control of mTOR-dependent  
805 mRNA. **(I)** Cand2 mRNA 2 days after TAC measured by RT-qPCR. **(J)** Schematic  
806 representation of reporter consisting of human Cand2 5'UTR and downstream *Renilla*  
807 luciferase coding sequence. Potential TOP-like motif is highlighted in a grey box. Grey arrows  
808 indicate transcription start sites in the adult heart according to Database of Transcriptional  
809 Start Sites (Release 10.1). Cand2 5'UTR effect on translation measured by luciferase activity  
810 in normal conditions and after mTORC1 block with Torin1. eEF2 – positive control of reporter  
811 with defined 5'TOP motif and non-TOP 5'UTR of  $\beta$ -Actin used as a negative control. Total  
812 protein content in lysates used for luciferase assay.

813  
814 **Figure 3. Cand2 is a muscle-specific protein**  
815 **(A)** Representative immunoblot of Cand2 protein levels in mouse organs. **(B)** Cand2  
816 expression in mouse organs measured by RT-qPCR. **(C)** Immunofluorescent staining of Cand2  
817 (red), actin (green) and nuclei (DAPI, blue) in paraffin sections from left ventricles of WT and  
818 Cand2 KO mice. Scale bar 20 $\mu$ m **(D)** Immunofluorescence of adult rat cardiomyocytes of  
819 Cand2 (red), sarcomeric actin (green), and nuclei (blue). Scale bar 50 $\mu$ m. **(E)** Immunoblot of  
820 subcellular fractionation of left ventricle (LV). Gapdh and Histone 3D (H3D) used as  
821 cytoplasmic and nuclear markers, respectively. WCL – whole cell lysate,  
822 cyt – cytoplasmic fraction, nuc – nuclear fraction.

823  
824

825 **Figure 4. Cand2 is required for cardiac hypertrophy induction.**  
826 **(A)** Representative immunoblot of Cand2 KD in NRCMs with Cand2 specific siRNA (siScr -  
827 control scrambled siRNA). **(B)** Cand2 OE in NRCMs (Cand2 AAV6; Ctr AAV – control AAV6  
828 vector) analyzed by Western blot.  $\beta$ -Actin – housekeeping protein. **(C)**. Cell surface area  
829 measurement of NRCM after Cand2 KD and 24h PE stimulation **(D)**. RT-qPCR analysis of  
830 *Nppa* transcript level after Cand2 KD. **(E)** NRCMs size measurement after Cand2 OE and 24h  
831 PE stimulation. **(F)** *Nppa* mRNA levels *in vitro* after Cand2 OE and PE treatment measured by  
832 RT-qPCR. **(G)** Ejection fraction 2 weeks after TAC in WT and Cand2 KO mice measured by  
833 echocardiography. **(H)** Fractional shortening 2 weeks after TAC in WT and Cand2 KO mice  
834 measured by echocardiography. **(I)** LV weight to body weight ratio of WT and Cand2 KO mice  
835 subjected to sham and TAC surgeries. **(J)** *Nppa* and *Nppb* mRNA levels 4 weeks after TAC  
836 measured by RT-qPCR. Error bars indicate means  $\pm$  SEM; \* -  $P \leq 0.05$ , \*\* -  $P \leq 0.01$ , \*\*\*\* -  $P$   
837  $\leq 0.0001$   
838

839 **Figure 5. Cand2-dependent Grk5 expression.**  
840 **(A)** Enrichment of Kyoto Encyclopedia of Genes and Genomes (KEGG) terms for differentially  
841 expressed genes in LV of Cand2 KO vs. WT mice (right panel). Volcano plot of up – (RNA-seq  
842  $\log_2$ -fold change of count per million  $>1$ ; red dots) and downregulated ( $>1$ ; blue dots)  
843 transcripts in LV after Cand2 KO (left plot). **(B)** Immunoblots and gel quantification of Grk5  
844 protein levels *in vitro* after Cand2 KD with siRNA and Cand2 OE with AAV6.  
845 **(C)** Grk5 expression levels in NRCMs depleted of and overexpressing Cand2 measured by  
846 RT-qPCR. **(D)** Grk5 protein levels *in vivo* in LVs of WT and Cand2 KO mice 4 weeks after  
847 sham and TAC analyzed by immunoblotting (upper panel) and its quantification (left bottom  
848 graph), and Grk5 mRNA levels in indicated conditions (right bottom graph).  
849 **(E)** Representative immunoblot of Grk5 protein in cytoplasmic and nuclear fractions from left  
850 ventricle lysates of WT and Cand2 KO mice after TAC surgery. Lamin B – nuclear marker,  
851 Gapdh – cytoplasmic marker.  
852

853 **Figure 6. Cand2 regulates MEF2 transcriptional activity.**  
854 **(A)** Luciferase based quantification of MEF2 activity after Cand2 KD in NRCMs.  
855 **(B)** mRNA levels of MEF2-dependent genes *Nr4a1* and *Xirp2* in NRCMs with Cand2 KD.  
856 **(C)** mRNA levels of MEF2-dependent genes *Nr4a1* and *Xirp2* in NRCMs with Cand2 OE.  
857 **(D)** RT-qPCR analysis of MEF2 targets in LVs of WT and Cand2 KO mice after sham and TAC  
858 surgeries. **(E)** Grk5 protein, mRNA levels in NRCMs and MEF2-luciferase activity after 24h of  
859 Torin 1 treatment. **(F)** Cand2 and Grk5 protein levels and Raptor transcript level in NRCMs after  
860 Raptor KD analyzed by Western blot **(G)** Quantifications of Cand2 and Grk5 protein levels and  
861 Grk5 transcript level in NRCMs depleted of Raptor. **(H)**, *Nppa*, and MEF2 targets *Nr4a1* and  
862 *Xirp2* mRNA levels in NRCMs after Raptor KD. Error bars indicate means  $\pm$  SEM; \* -  $P \leq 0.05$ ,  
863 \*\* -  $P \leq 0.01$ , \*\*\* -  $P \leq 0.001$ , \*\*\*\* -  $P \leq 0.0001$   
864

865 **Figure 7. Cand2 and Cullin1 neddylation modulate Grk5 protein level.**  
866 **(A)** Representative immunoblot and its quantification of protein levels of neddylated and  
867 unneddylated Cul1 in NRCMs after Cand2 OE. **(B)** Cul1 neddylation analyzed by Western blot  
868 in NRCMs depleted of Cand2. NRCMs were treated with MLN4924 to block Cul1 neddylation.  
869 The graphs show immunoblot quantification. **(C)** Cell size area measurement of NRCMs after  
870 Cand2 KD and neddylation inhibition (MLN). **(D)** Grk5 expression in NRCMs upon Cand2 KD  
871 and Cul1 neddylation inhibition examined by immunoblot and RT-qPCR.  
872 **(E)** The half-life of Grk5 in HeLa cells overexpressing Cand2 measured by cycloheximide  
873 chase. **(F)** Grk5 protein and mRNA levels *in vitro* after Cul1 KD and immunoblot quantification.  
874 **(G)** Comparison of NRCMs size with Cand2 KD, Grk OE after PE stimulation. Immunoblot  
875 confirms Cand2 KD and Grk5 OE. Error bars indicate means  $\pm$  SEM; \* -  $P \leq 0.05$ , \*\* -  $P \leq 0.01$ ,  
876 \*\*\* -  $P \leq 0.001$ , \*\*\*\* -  $P \leq 0.0001$  **(H)** Model of Cand2-dependent stabilization of Grk5 by Cul1  
877 neddylation inhibition in mTOR-dependent manner.  
878

879 **Expanded View Figures**

880

881 **EV 1. Specific inhibition of mTOR pathway by Torin1.**

882 **(A)** NRCMs treated with increasing concentration of Torin1 for 24h analyzed by immunoblotting.  
883 mTORC1 inhibition was detected by total and phosphorylated levels of S6RP and 4E-BP1.  
884 mTOR2 activity was analyzed by Akt phosphorylation. PI3K pathway was analyzed by the  
885 phosphorylation level of its downstream target Erk1/2. **(B)** Expression of mTOR-dependent  
886 transcripts. eEF2 and Rps5 levels were analyzed by immunoblot (left panel) and RT-qPCR  
887 (right panel) after PE and Torin1 treatment. Csq – casein kinase II has been used as a  
888 housekeeping protein. **(C)** mTOR-dependent expression of hypertrophy markers. RT-qPCR  
889 analysis of *Nppa* and *Nppb* mRNA levels after PE and Torin 1 treatment of NRCMs. **(D)**  
890 Polysome profiles of control and PE- and Torin1-treated NRCMs.

891

892 **EV 2**

893 **(A)** Representative bright-field images of isolated cardiac myocytes stimulated with (PE, 50  
894  $\mu$ M for 24 h) with or without mTOR inhibition (Torin 1, 150 nM) and quantification of cell surface  
895 area measurements from control, PE treatment, and Torin 1 treatment. n=4 independent  
896 experiments, \* -  $P < 0.01$  different from PE. Scale bar 100 $\mu$ m **(B)** Luciferase activity from  
897 control, PE treated, and Torin 1 treated cardiac myocytes. n=2 independent experiments, \* -  $P$   
898  $< 0.01$  different from PE. **(C)** Heart weight (HW) to body weight (BW) ratio (HW/BW) in control  
899 and Torin 1-treated mice (10 mg/kg BW) 2 days after sham or TAC surgery. \* -  $P < 0.05$  different  
900 from TAC. n=3 per group

901

902 **EV 3. Cand2 knock-out mouse model characterization.**

903 **(A)** Cand2 protein levels in WT, heterozygous, and homozygous Cand2 knock-out mice  
904 analyzed by immunoblotting in muscle tissues. **(B)** The percentage of ejection fraction in WT  
905 and Cand2 KO analyzed by echocardiography prior sham/TAC surgeries. **(C)** The baseline of  
906 LV weight (mg) to body weight (g) ratios of WT and KO Cand2 mice. **(D)** RT-qPCR analysis of  
907 Cand2 and Cand1 transcript levels in WT and Cand2 KO mice. **(E)** *Nppa* and *Nppb* **(F)**  
908 transcripts in WT and Cand2 KO mice.

909

910 **EV 4. Cand2 interacts with Cul1 and Grk5 in cardiomyocytes.**

911 **(A)** Cand2, Cul1, and Grk5 association analyzed by co-immunoprecipitation (IP) of  
912 endogenous Grk5 with Cand2-specific antibody and immunoblotting (i – input; IgG – negative  
913 control, IP with anti-rabbit IgG antibody) and Immunoprecipitation of endogenous Cul1 with  
914 Cand2 specific antibody (i – input; IgG – negative control, IP with anti-rabbit IgG antibody). **(B)**  
915 Interaction of Cand2 with Grk5 measured by proximity ligation assay (PLA). PLA (red) in  
916 primary neonatal rat (NRCMs) and cardiomyocytes isolated from hearts of wild-type **(C)** and  
917 Cand2 KO **(D)** neonatal mice (NMCMs). Each red dot represents the interaction of endogenous  
918 Cand2 and Grk5. No dots were detected in mouse cardiomyocytes from Cand2 KO hearts. **(E)**  
919 PLA of Cand2 and Cullin1 in NRCMs and **(F)** NMCMs from WT and **(G)** Cand2 KO mice. Red  
920 dots represent the Cand2 and Cul1 association. No dots were detected in mouse  
921 cardiomyocytes from Cand2 KO hearts. Scale bar 20 $\mu$ m

922

923 **EV 5. Cand2 regulates Grk5 protein level by Cullin1 neddylation inhibition.**

924 **(A)** RT-qPCR analysis of Cand2 mRNA levels in NRCMs after neddylation inhibition (MLN)  
925 and Cand2 KD with siRNA. **(B)** Cul1 expression in NRCMs overexpressing (left graph) and  
926 depleted of Cand2 (right graph) examined by RT-qPCR. **(C)** Grk5 and Cul1 mRNA levels in  
927 NRCMs overexpressing Grk5 measured by RT-qPCR.

928

# Figure 1

**A**

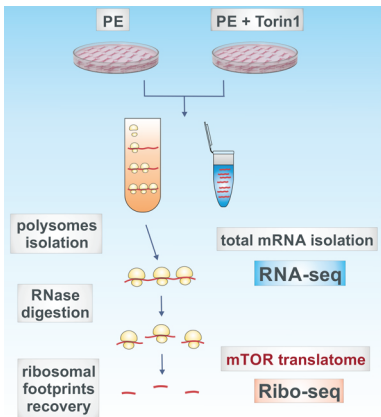

**B**

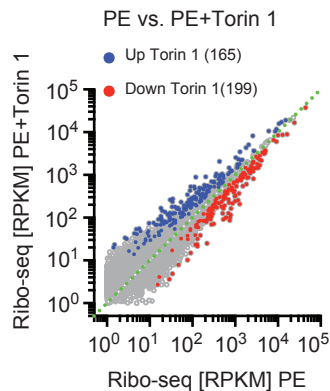

**C**

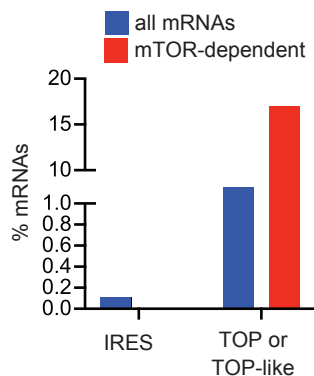

**D**

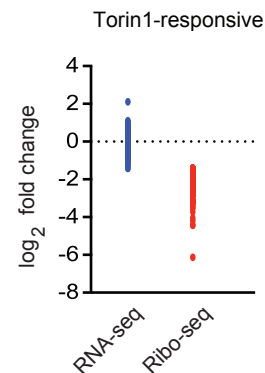

**E**

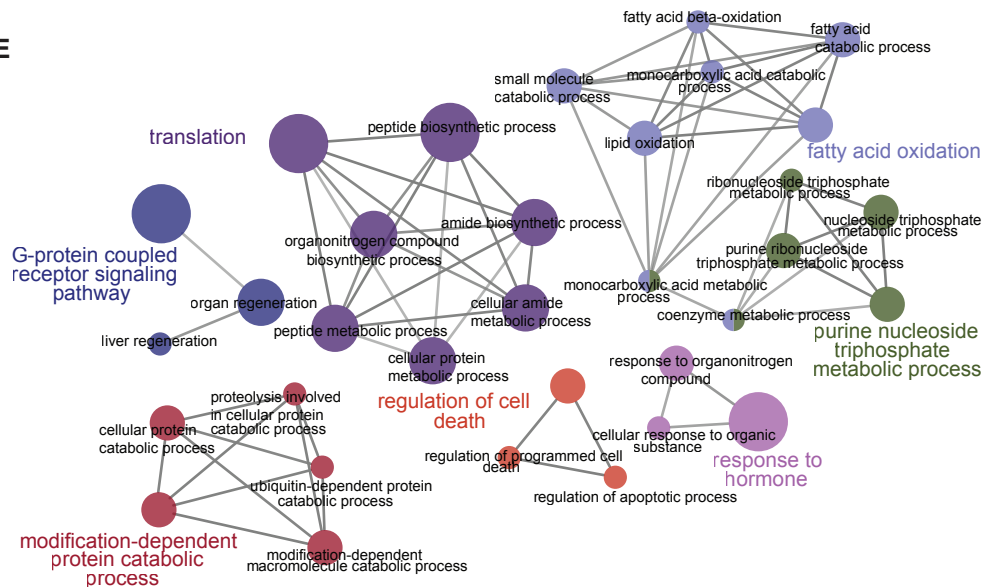

**F**

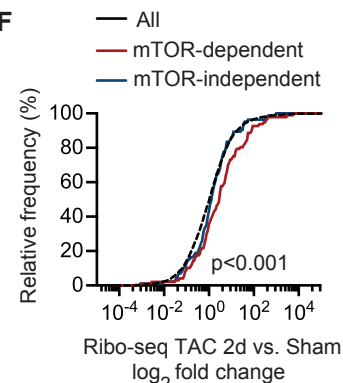

**G**

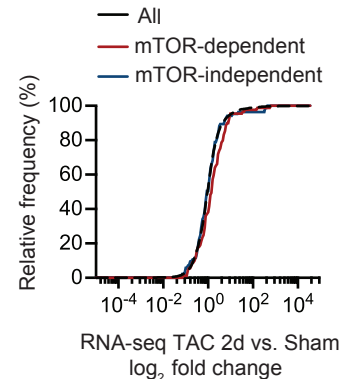

**H**

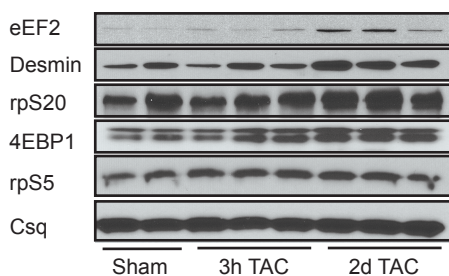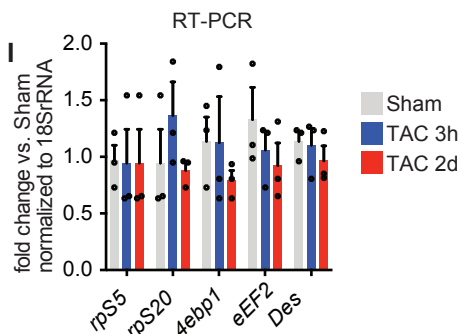

## Figure 2

**A**

DEGs in response to TAC surgery

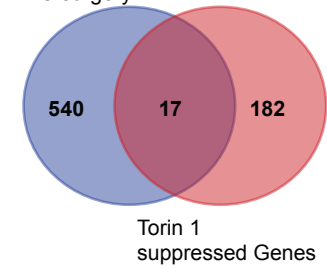

| mTOR targets |                  |                |
|--------------|------------------|----------------|
| gene         | fold change      |                |
|              | vehicle vs Torin | sham vs TAC 2d |
| G0s2         | -2.77            | 2.34           |
| Rps9         | -1.88            | 1.68           |
| <b>Cand2</b> | <b>-2.46</b>     | <b>1.61</b>    |
| Eef2         | -4.42            | 1.49           |
| Flot2        | -2.19            | 0.93           |
| Dapk3        | -2.18            | 0.89           |
| Ybx3         | -1.44            | 0.88           |
| Mtch1        | -2.00            | 0.81           |
| Prnd         | -1.70            | 0.81           |
| Pdia6        | -1.55            | 0.77           |
| Eef1d        | -1.80            | 0.76           |
| Cct7         | -2.60            | 0.66           |
| Zfp830       | -1.75            | 0.66           |
| Wdr6         | -1.51            | 0.62           |
| Gas6         | -2.69            | 0.62           |
| Canx         | -1.73            | 0.53           |
| Abcf1        | -1.98            | 0.50           |

**B**

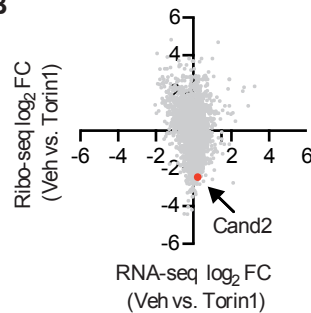

**C**

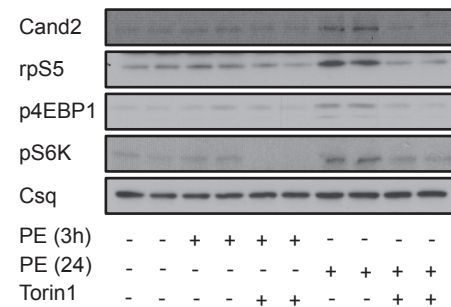

**D**

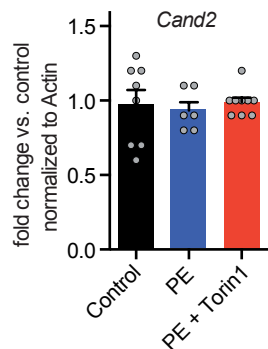

**E**

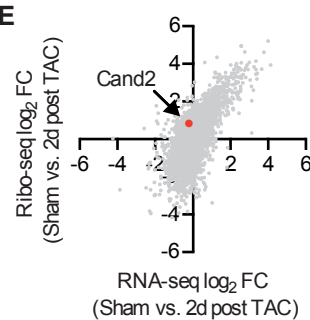

**F**

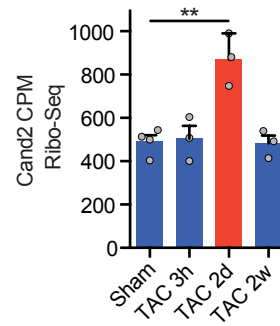

**G**

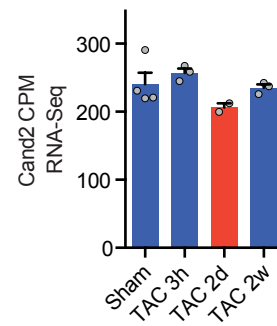

**H**

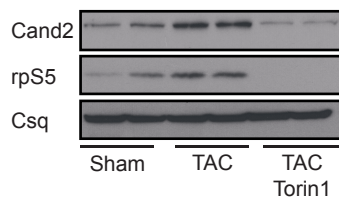

**I**

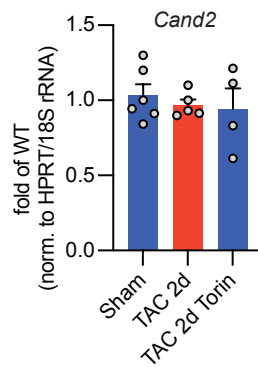

**J**

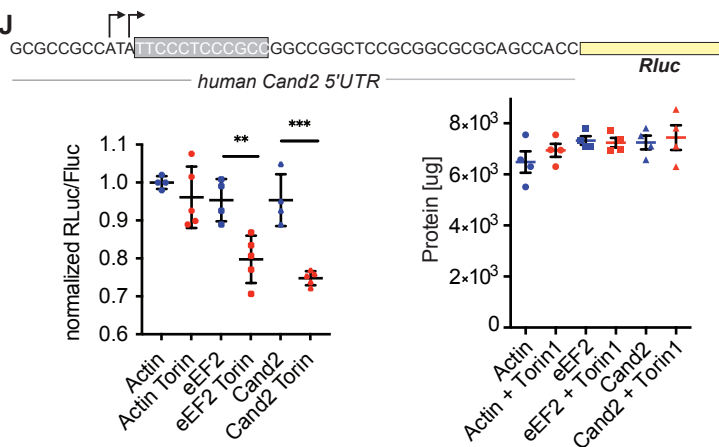

# Figure 3

**A**

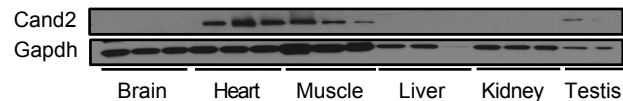

**B**

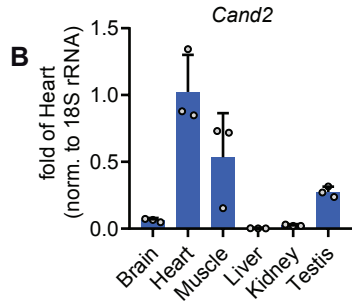

**C**

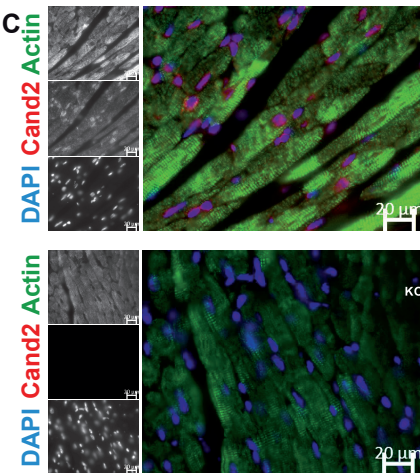

**D**

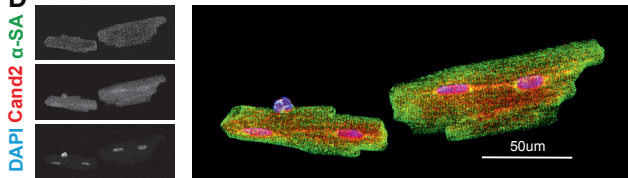

**E**

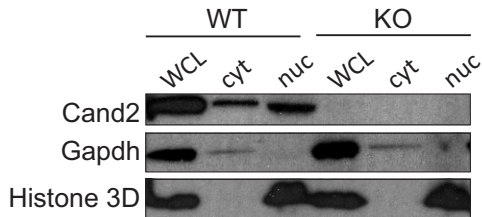



# Figure 4

**A**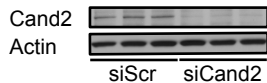**B**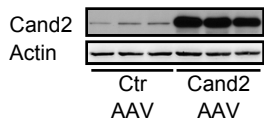**C**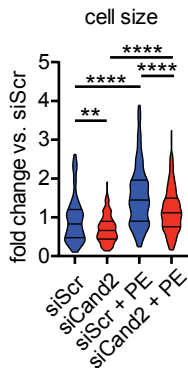**D**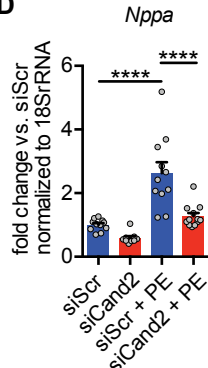**E**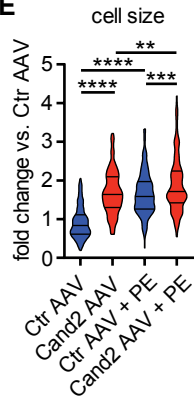**F**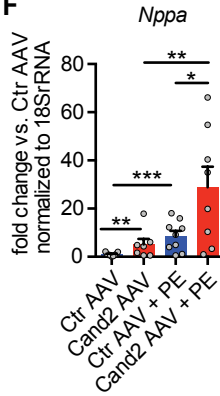**G**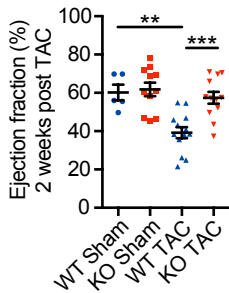**H**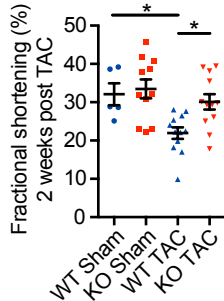**I**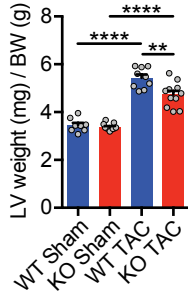**J**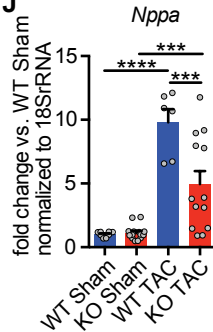

*Nppb*

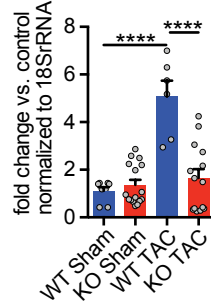

**Figure 5****A**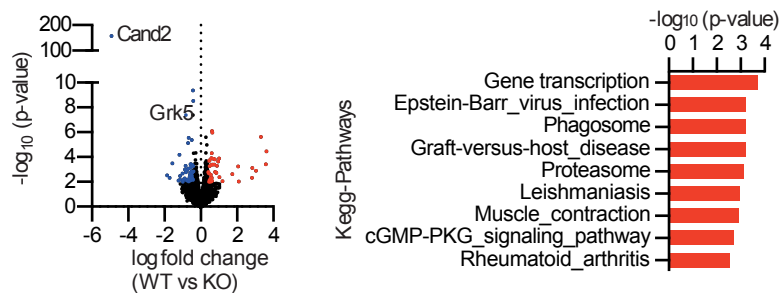**B**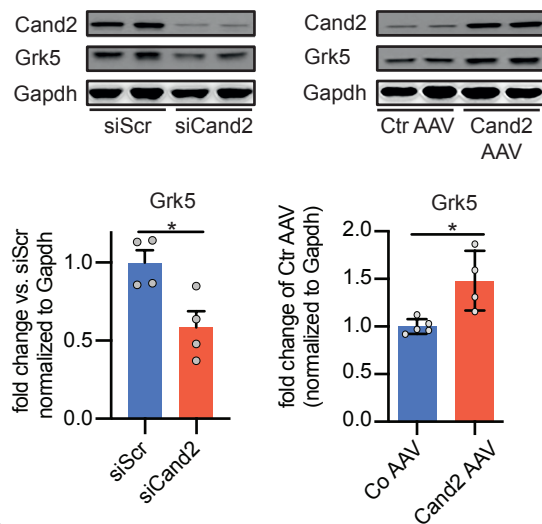**D**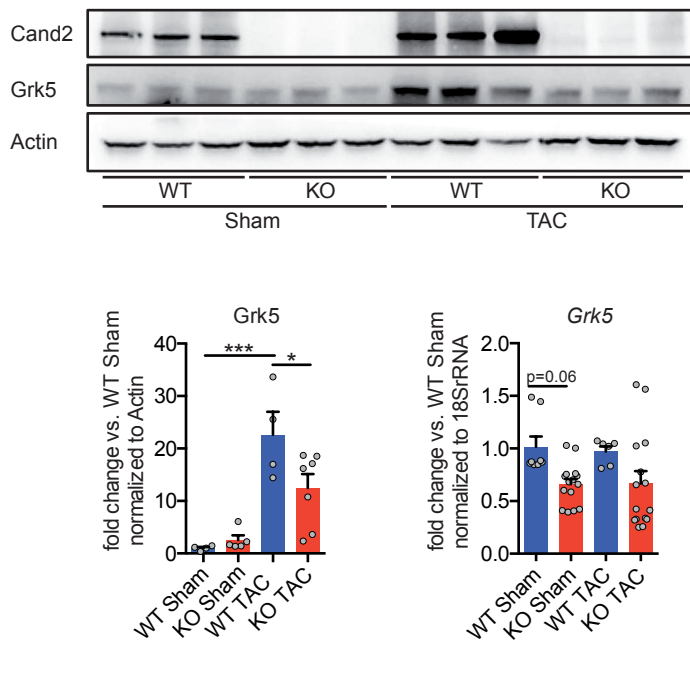**C**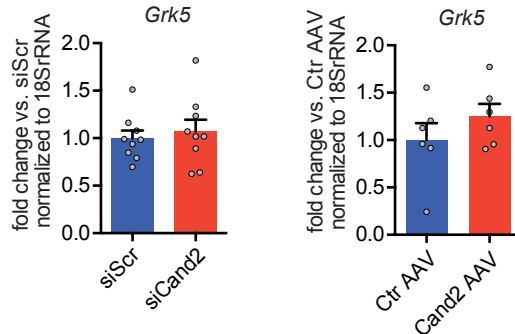**E**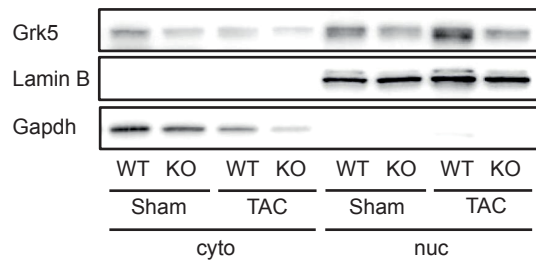

**Figure 6**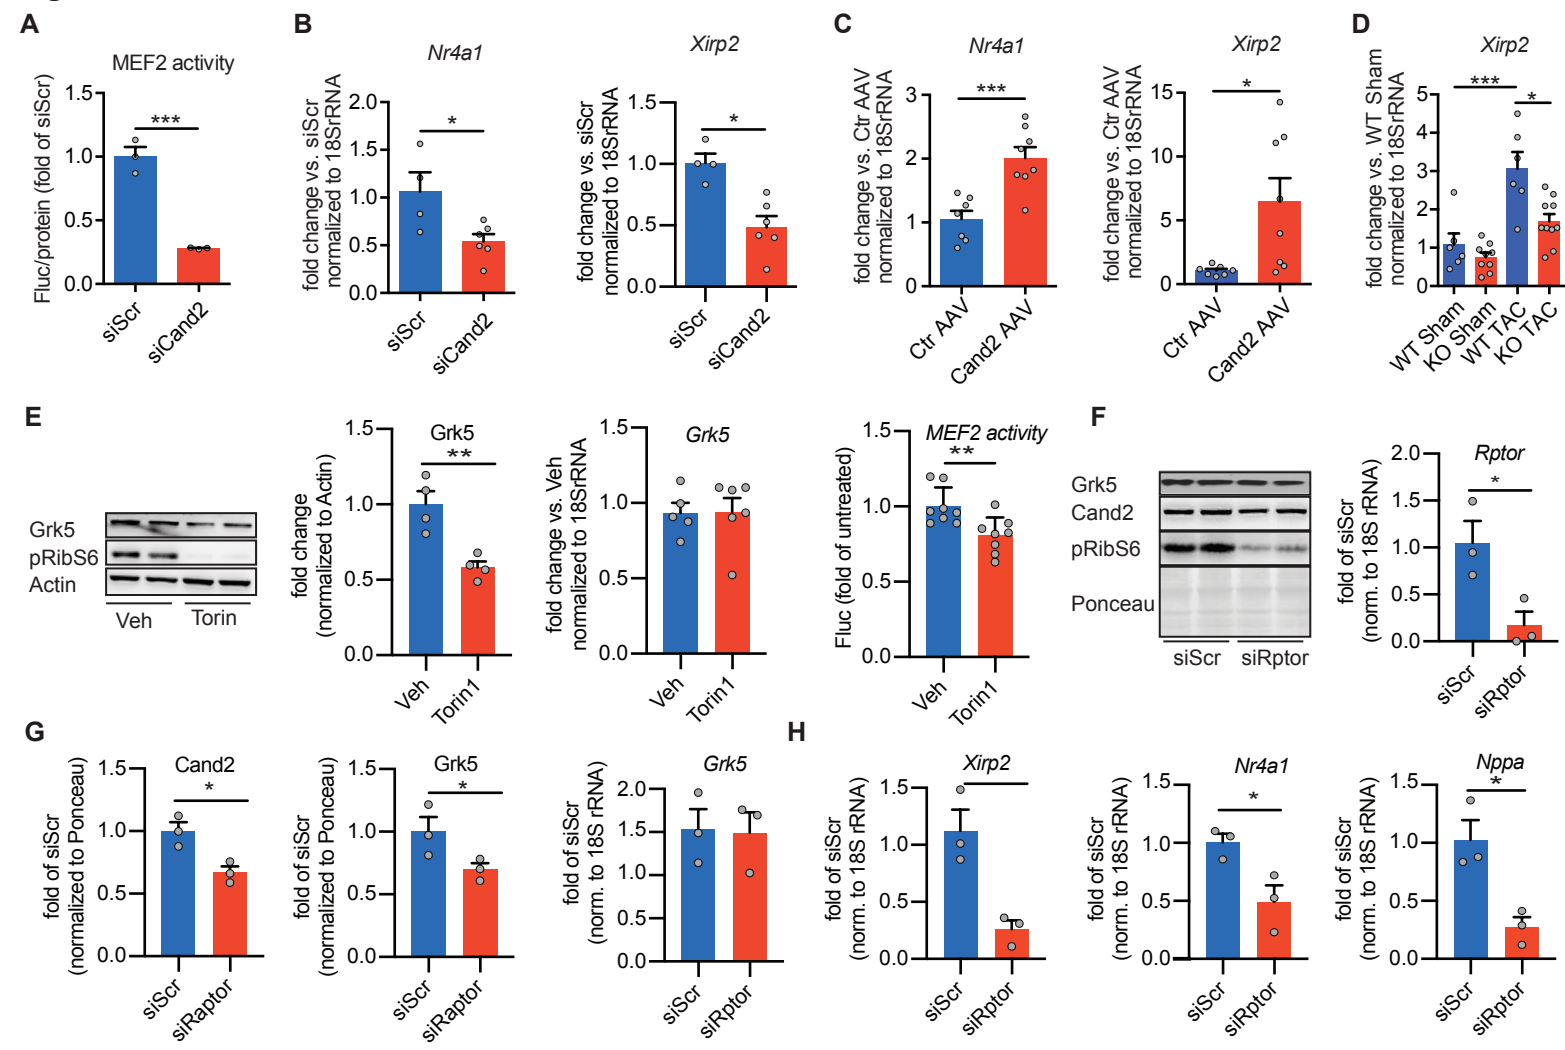

**Figure 7**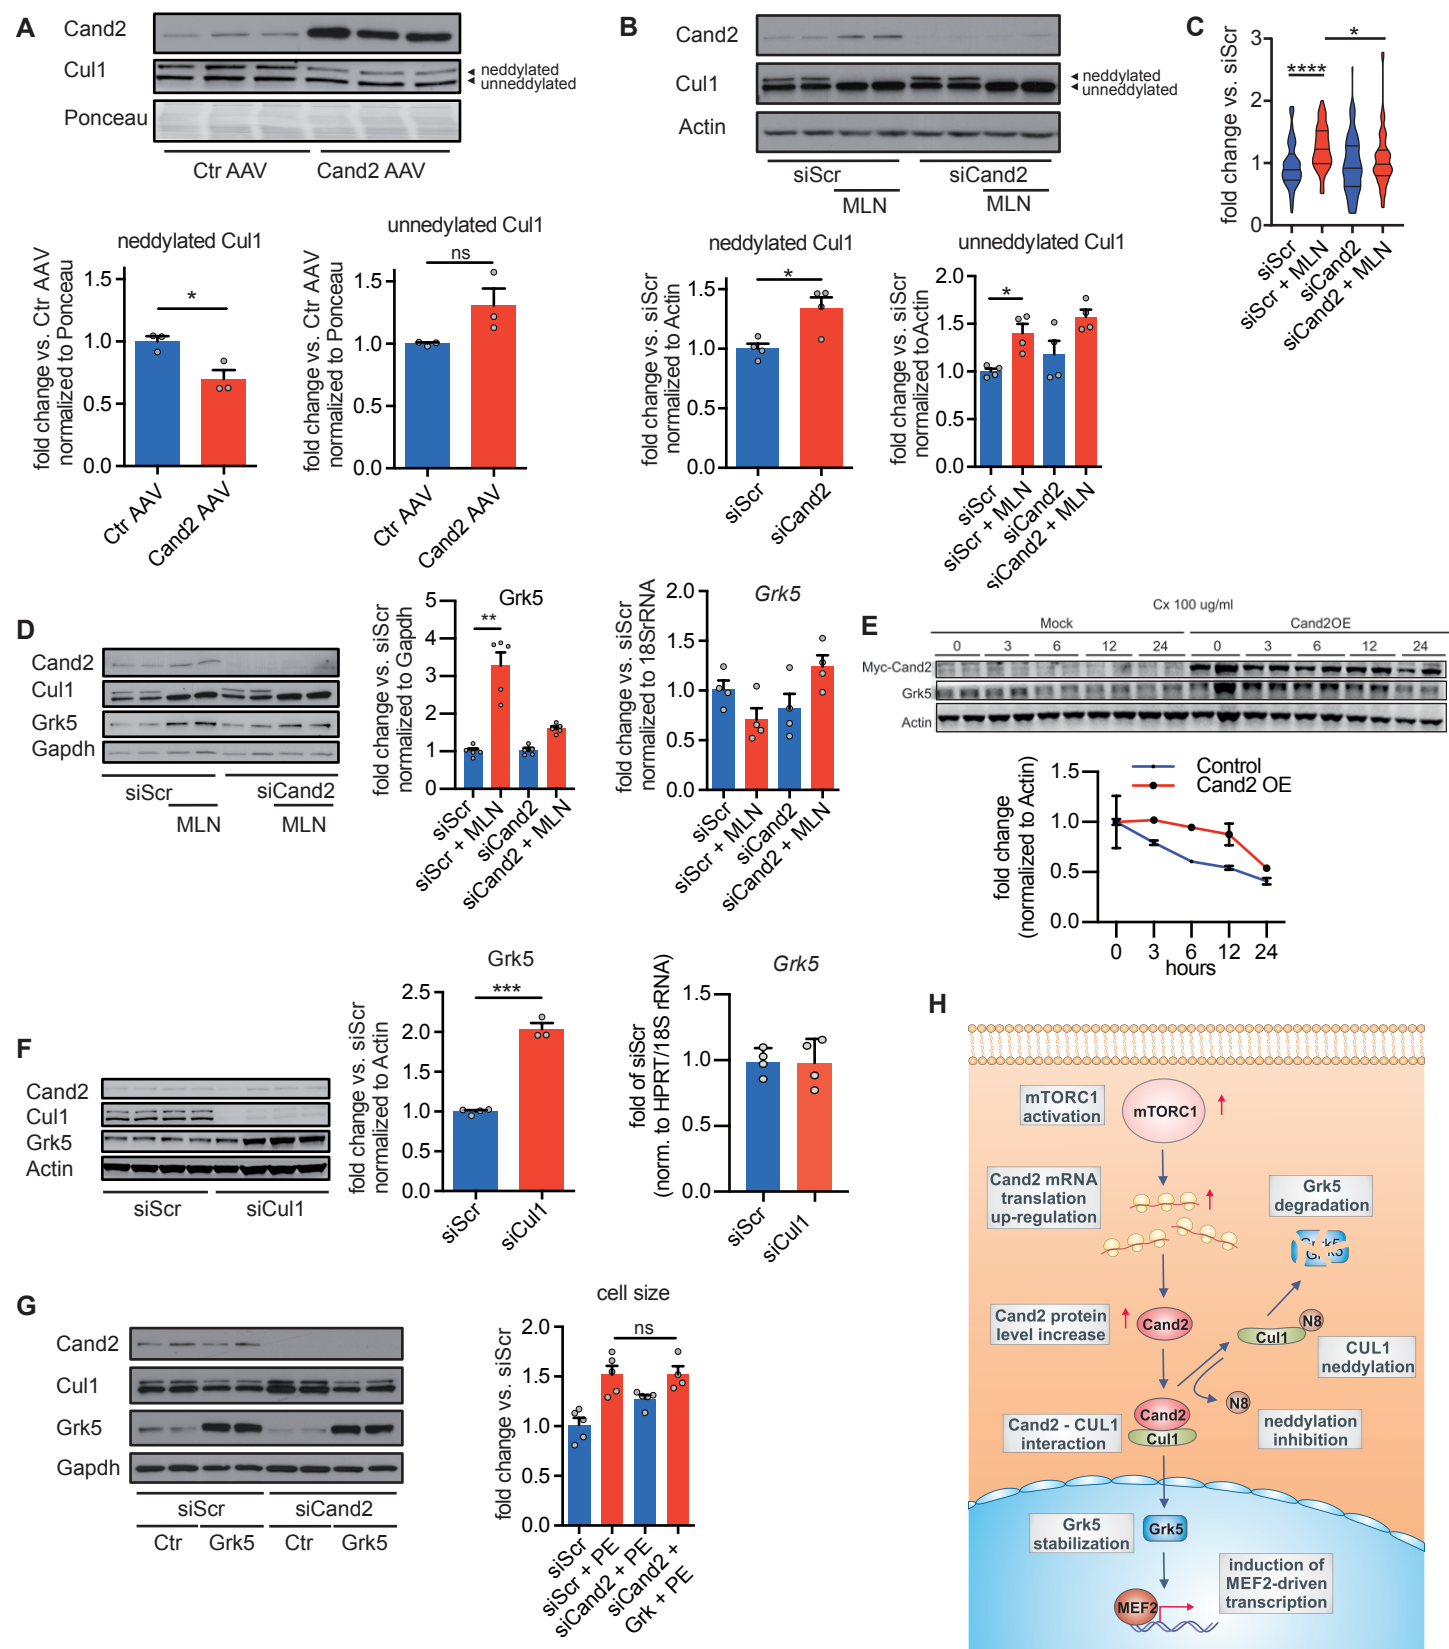

Source: http://biorxiv.org/content/10.1101/2020.11.29.403196v1.full.pdf
